1  
2  
3  
4  
5  
6  
7  
8  
9  
10  
11  
12  
13  
14  
15  
16  
17

**Multiple phase-variable mechanisms, including capsular polysaccharides, modify  
bacteriophage susceptibility in *Bacteroides thetaiotaomicron***

\*Nathan T. Porter<sup>1</sup>, \*Andrew J. Hryckowian<sup>2</sup>, Bryan D. Merrill<sup>2</sup>, Jackson O. Gardner<sup>2</sup>, Shaleni  
Singh<sup>1</sup>, Justin L. Sonnenburg<sup>2</sup>, and Eric C. Martens<sup>1</sup>

<sup>1</sup>*Department of Microbiology and Immunology, University of Michigan, Ann Arbor, MI 48109,  
USA*

<sup>2</sup>*Department of Microbiology and Immunology, Stanford University School of Medicine,  
Stanford, CA 94305*

\*These authors contributed equally to this work

Correspondence to: [emartens@umich.edu](mailto:emartens@umich.edu)

## 18 **Abstract**

19           A variety of cell surface structures, including capsular polysaccharides (CPS), dictate the  
20 interactions between bacteria and elements of their environment including their viruses  
21 (bacteriophages). Members of the prominent human gut Bacteroidetes characteristically produce  
22 several phase-variable CPS, which have been demonstrated as key determinants in interacting  
23 with the host immune system. However, the contributions of Bacteroidetes CPS to bacteriophage  
24 interactions are unknown. We used engineered strains of the human symbiont *Bacteroides*  
25 *thetaiotaomicron*, which differ only in the CPS they express, to isolate bacteriophages from two  
26 locations in the United States. Testing each of 71 bacteriophages against a panel of strains that  
27 express wild-type phase-variable CPS, one of eight different single CPS, or no CPS at all,  
28 revealed that each infects only a subset of strains. Deletion of infection-permissive CPS from *B.*  
29 *thetaiotaomicron* was sufficient to abolish infection for several individual bacteriophages.  
30 Likewise, infection of wild-type *B. thetaiotaomicron* with one bacteriophage from this collection  
31 selected for a cell population expressing non-permissive CPS. Surprisingly, acapsular *B.*  
32 *thetaiotaomicron* also escapes complete killing by this bacteriophage, but surviving bacteria  
33 increased expression of a family of 9 phase-variable lipoproteins. When constitutively expressed,  
34 one of these lipoproteins enhances resistance to this bacteriophage. Our results reveal distinct  
35 roles for *Bacteroides* CPS in mediating bacteriophage susceptibility. Beneath this vanguard  
36 protective layer, additional mechanisms exist to protect these bacteria from being eradicated by  
37 bacteriophage. Given the diversity of CPS and other phase-variable surface structures encoded  
38 by gut-dwelling Bacteroidetes, our results provide important insight into the adaptations that  
39 allow these bacteria to persist despite bacteriophage predation and hold important implications  
40 for using bacteriophages therapeutically to target gut symbionts.

41

## 42 **Introduction**

43           The community of cellular microorganisms in the human intestinal tract is dominated by  
44 a diverse population of bacteria, with hundreds of different species and even more strains  
45 typically present within one person<sup>1</sup>. In the face of frequent perturbations from a variety of  
46 environmental pressures, including diet changes, antibiotics and host immunity, the relative  
47 abundances of different bacteria may vary greatly within an individual over short time periods.  
48 However, the microbiota members within a host generally remain stable over long time  
49 periods<sup>2,3</sup>, suggesting that individual bacteria have evolved strategies that enable them to be  
50 resilient in the face of challenges. One potential adaptive mechanism that has clearly been  
51 diversified in gut resident Bacteroidetes is the ability of individual strains to alternately produce  
52 several different capsular polysaccharides (CPS), which are extracellular matrix components  
53 encoded by *cps* biosynthetic loci. Many *cps* loci in the Bacteroidetes are under the control of  
54 phase variable promoters, allowing for substantial phenotypic heterogeneity within an isogenic  
55 population. Furthermore, there is much broader diversification of *cps* loci among different strains  
56 within a species<sup>4-7</sup>. While a few studies have shown that these CPS take part in evasion or  
57 modulation of host immunity<sup>4,8-11</sup>, the sheer diversity and number of CPS synthesis loci in the  
58 Bacteroidetes suggests that they could also fill other fundamental roles<sup>4,6,12,13</sup>.

59           Bacterial viruses or bacteriophages (herein, phages), like the bacteria on which they prey,  
60 vary greatly across individual gut microbiomes and are even responsive to host dietary changes  
61 or disease states<sup>14-17</sup>. Compared to its bacterial counterpart, far less is understood about the  
62 human gut virome, especially the mechanisms governing phage-bacteria interactions.  
63 Specifically, while phages that target several species of *Bacteroides* (the prominent genus of the

64 Bacteroidetes phylum in humans) have been shown to exhibit species- or strain-specificity<sup>18-21</sup>,  
65 little is known about the molecular interactions that drive bacterial susceptibility<sup>22</sup> or the  
66 mechanisms by which these bacteria persist despite an abundance of phages in the  
67 gastrointestinal tract.

68         Given the observations that *Bacteroides* CPS are extremely variable, even within  
69 members of a single species<sup>4,12</sup>, and employ complex regulatory mechanisms that diversify  
70 expression in members of a population<sup>4,23</sup>, CPS are ideal candidates for modulating *Bacteroides*-  
71 phage interactions. Thus, we sought to test the hypothesis that CPS are direct positive or negative  
72 mediators of *Bacteroides*-phage interactions. To accomplish this, we employed a panel of  
73 engineered strains of the model symbiont *Bacteroides thetaiotaomicron* that each constitutively  
74 expresses a different single CPS or none at all. While our results clearly support the conclusion  
75 that specific CPS may either block or be required for phage infection, they also reveal that *B.*  
76 *thetaiotaomicron* possesses additional phage-evasion strategies that function in the absence of  
77 CPS. For one phage, CPS-independent survival involves altered expression of nutrient receptors  
78 and increased expression of phase-variable surface lipoproteins by the surviving bacteria. One  
79 hypothesis is that these latter functions also encode active resistance mechanisms. This idea is  
80 supported by locking on expression of one of these lipoproteins, which we show to be an  
81 additional determinant of phage tropism, conferring increased resistance to this phage. Our  
82 results provide a mechanistic glimpse into the intricacy of bacterial-phage interactions that exist  
83 in the human gut and provide a foundation for future work aimed at leveraging these interactions  
84 as a facet of targeted manipulation of the gut microbiome.

## 85 **Results**

### 86 **Individual bacteriophages target *B. thetaiotaomicron* in a CPS-dependent fashion**

87 To test the hypothesis that variable *Bacteroides* surface CPS mediate interactions with  
88 phages, we isolated phages that infect *B. thetaiotaomicron* VPI-5482 (ATCC 29148). To  
89 maximize our chances of collecting phages that could differ in their interactions with CPS, we  
90 used the wild-type strain of *B. thetaiotaomicron* that expresses 8 different, phase-variable CPS,  
91 each encoded by a different multi-gene *cps* locus; an isogenic panel of 8 single CPS-expressing  
92 strains (designated “*cps1*” through “*cps8*”)<sup>25</sup>; and an acapsular strain in which all *cps* genes from  
93 all 8 loci are deleted<sup>24</sup> as independent hosts for phage isolation. Primary sewage effluent from  
94 two cities within the United States (Ann Arbor, Michigan and San Jose, California; separated by  
95 approximately 3,300 kilometers) was used as the source for these phages (for further details on  
96 phage isolation, see *Methods* and **Table S1**). All phages were plaque purified at least 3 times and  
97 high titer lysates were generated for each of the 71 phages. Plaque morphologies varied greatly  
98 among the strains, ranging in size from <1 mm to 3 mm or greater and in opacity from very  
99 turbid to clear (**Figures 1, S1**).

100 To determine if phages isolated on each individual host strain are restricted in their ability  
101 to infect other strains, we systematically tested each phage against each of the 10 *B.*  
102 *thetaitotaomicron* host strains that varied only in the CPS they are capable of expressing (n=3).  
103 Hierarchical clustering of the host infection profiles revealed a cladogram with 3 main branches  
104 that each encompasses phages from both collection sites, although substantial variation in host  
105 tropism exists for phages within each branch (**Figure 1**). Furthermore, individual phages within  
106 each branch displayed a range of plaque morphologies (**Figures 1, S1**), suggesting additional  
107 diversity in the collection that is not captured by this assay. Finally, host range assays were  
108 robust when performed by different experimenters at different research sites (**Figure S2**).

109           Phages in Branch 1 generally exhibited robust infection of the acapsular strain, although  
110   3 of these phages did not form plaques on this host. Furthermore, phages in Branch 1 generally  
111   exhibited robust infection on strains expressing CPS7 or CPS8 alone, although a separate subset  
112   of 3 phages did not form plaques on the CPS8 expressing strain. Some Branch 1 phages also  
113   displayed less efficient infection of other strains with the exception of *cps4*, which was not  
114   infected by any phages in this group. Interestingly, ARB154 exclusively infected *cps8*, an  
115   uncommon CPS among *B. thetaiotaomicron* strains that appears to be contained in a mobile  
116   element<sup>4</sup>. Phages in Branch 2 generally exhibited robust infection of all strains except *cps2*, *cps3*  
117   and *cps4*. However, subsets of this group were unable to infect *cps1* or *cps6*. Finally, Branch 3  
118   tended to exhibit strong infection of wild-type, *cps1*, *cps2*, and *cps3*, with some variations. Some  
119   Branch 3 phages also exhibited the ability to infect the *cps7* and acapsular strains but were the  
120   only branch that poorly infected *cps8*. A subset of phages on Branches 1 and 3 failed to infect the  
121   acapsular strain, suggesting that they may require the presence of CPS for infection. Taken  
122   together, the observed variations in phage infection of *B. thetaiotaomicron* strains expressing  
123   different CPS, or none at all, provide initial support for our hypothesis that these surface  
124   structures are a key mediator of *B. thetaiotaomicron*-phage interactions.

125

## 126   **Elimination of specific CPS subsets alters bacterial susceptibility to phages**

127           One explanation for the differences in host infectivity described above is that there are  
128   distinct, CPS-dependent mechanisms of phage adsorption. For example, several phages robustly  
129   infect the acapsular strain, indicating that a capsule-independent cell surface receptor mediates  
130   infection for these examples. However, each of these phages also infect subsets of the single  
131   CPS-expressing strains, suggesting that some “non-permissive” CPS could block access to cell

132 surface receptors, while other “permissive” CPS fail to do so. For phages that do not efficiently  
133 infect the acapsular strain, one or more CPS may serve as a direct phage receptor(s) or as a  
134 required co-receptor.

135 To further define the roles of specific CPS during phage infection, we investigated a  
136 subset of 6 phages (ARB72, ARB78, ARB82, ARB101, ARB105, and ARB25). All 6 of these  
137 phages can infect the wild-type *B. thetaiotaomicron* strain that variably expresses its 8 different  
138 CPS and 5 of them infect the acapsular strain poorly or not at all (**Figure 1**). We tested our  
139 hypothesis that some CPS are required as receptors or co-receptors by deleting only the subsets  
140 of CPS biosynthetic genes encoding permissive capsules based on our prior experiments with  
141 single CPS-expressing strains. For ARB72, which most robustly infects the CPS1- and CPS3-  
142 expressing strains, simultaneous elimination of both of these capsules from wild-type *B.*  
143 *thetaiotaomicron* reduced infection below the limit of detection (**Figure 2A**). Likewise,  
144 elimination of the most permissive CPS for four other phages (ARB78, ARB82, ARB101 and  
145 ARB105) significantly reduced *B. thetaiotaomicron* infection by these phages, in some cases in  
146 the presence of permissive CPS (**Figure 2B-E**).

147 For ARB25, which infected 7 of the 10 strains tested in our initial plaque assays (**Figure**  
148 **1**), some single and compounded *cps* gene deletions significantly reduced infection rates or  
149 reduced them below the limit of detection. The most noteworthy of these was deletion of the  
150 *cps4* (initially determined in **Figure 1** to be non-permissive for ARB25) in combination with  
151 deleting the permissive *cps1*, which completely eliminated detectable infection (**Figure 2F**).  
152 While individual deletion of four other permissive CPS (*cps1,6,7,8*) led to partially reduced  
153 infection, so did single deletions of two CPS initially determined to be non-permissive (*cps3* and  
154 *cps4*), suggesting the possibility of more complicated regulatory interactions, which are known

155 to occur with *Bacteroides* CPS<sup>23,26</sup>. Interestingly, strains lacking either *cps4* or *cps1/cps4*  
156 together compensated by significantly increased relative expression of the non-permissive *cps2*  
157 locus, which could contribute to ARB25 resistance (**Figure 2G**).

158 A strain expressing only two of the non-permissive CPS (CPS2 and CPS3) could not be  
159 detectably infected by ARB25 (**Figure 2F**, “2,3 only” condition). However, a strain expressing  
160 CPS2,3,4 regained some susceptibility (**Figure 2F**, “2,3,4 only” condition), indicating that CPS4  
161 is capable of mediating some infection by this phage (addressed further below). In contrast to  
162 sole expression of *cps2* and *cps3* promoting resistance to ARB25, deletion of the *cps2* and *cps3*  
163 loci led to dominant expression of *cps1* and *cps4* genes, which increased infection efficiency and  
164 led to the production of clearer plaques (**Figure 2F,H**). Additional support for the idea that loss  
165 of *cps4* alone modifies ARB25 susceptibility comes from plaque morphologies arising from  
166 infection of the  $\Delta cps4$  strain, which produced smaller and more turbid plaques, demonstrating  
167 that when infection does occur it is less productive (**Figure 2H**). Thus, CPS4-expressing cells are  
168 in some cases susceptible to ARB25, and loss of the genes encoding this capsule result in  
169 increased expression of CPS2, perhaps through alleviation of the UpxZ transcription termination  
170 mechanism, as described for capsule regulation in *B. fragilis*<sup>23</sup>. Because this programmed shift in  
171 CPS expression may increase resistance to phage, it is possible that phase-variation can equip  
172 *Bacteroides* populations to survive phage predation through selection of individual cell sub-  
173 populations that are expressing non-permissive CPS.

174 Finally, we used ARB25 to test if purified, exogenous CPS could modify phage infection  
175 as has been shown for other phage-CPS interactions<sup>27</sup>. Given that strains expressing CPS1 and  
176 CPS2 show different susceptibility to infection by ARB25, we tested purified preparations of  
177 both CPS types, expecting that exogenous CPS2 might inhibit ARB25 infection of the acapsular



178 strain if it is capable of directly interfering with recognition of a surface receptor. Arguing  
179 against this hypothesis, pre-incubation with purified preparations of CPS2 or CPS1 (a permissive  
180 capsule control) both resulted in no significant difference in plaquing efficiency on the acapsular  
181 strain (**Figure S3A**), suggesting that exogenous CPS cannot block infection by phage ARB25.

182

### 183 ***B. thetaiotaomicron* acquires transient resistance to phage infection**

184 Interestingly, we observed that liquid cultures of the various *B. thetaiotaomicron* strains  
185 infected with ARB25 did not show evidence of complete lysis after 36 hours of growth, as  
186 determined by optical density at 600 nm (OD<sub>600</sub>) (**Figure 3**). Previous reports demonstrated that  
187 *B. fragilis*<sup>20</sup> and *B. intestinalis*<sup>21</sup> exhibited transient resistance to phage infection that could be  
188 “reset” through removal of the phage from the culture, although the underlying mechanism of  
189 this transient resistance was not determined. Based on these observations, we questioned whether  
190 similar transient resistance occurs with *B. thetaiotaomicron* and whether this resistance could be  
191 dependent on CPS expression. Growth curves of each of the CPS-expressing strains inoculated  
192 with active or heat-killed ARB25 confirmed our initial host range assays, except that cultures  
193 containing the CPS4-expressing strain were sensitive to killing by this phage in liquid culture,  
194 while cultures of the CPS6-expressing strain had no significant decrease in OD<sub>600</sub> (**Figure 3**). In  
195 these experiments, most strains deemed to be susceptible via plaque assay (**Figure 1**) exhibited  
196 an initial lag in growth or a drop in OD<sub>600</sub>. As expected, the *cps2* and *cps3* strains remained  
197 resistant to ARB25 infection for the duration of the experiments. However, after initial growth  
198 inhibition, the susceptible strains displayed either growth stagnation without complete loss of  
199 culture density (*cps4*, *cps5*, *cps7*, *cps8*) or resumption of growth (wild-type, acapsular, *cps1*) to  
200 near uninfected levels, the latter suggesting outgrowth of a resistant subpopulation of bacteria.  
201 Culture supernatants taken from ARB25 post-infected, wild-type *B. thetaiotaomicron* still

202 contained high phage titers when exposed to naïve bacteria that had not been exposed to phage,  
203 excluding the possibility that the phages were inactivated (**Figure S3B**).

204 We next determined whether strains that had survived or proliferated after exposure to  
205 phage retained resistance after removal of phage. In order to isolate phage-free bacterial clones,  
206 we isolated individual colonies by sequentially streaking each twice from a subset of the cultures  
207 that gained resistance to ARB25 (WT, *acapsular*, *cps1*, and *cps4*) as well as the inherently  
208 ARB25-resistant *cps2* strain. The majority of clones isolated using this process were free from  
209 detectable phage (see *Methods*). We then re-infected each clone with live ARB25 and monitored  
210 susceptibility by delayed growth or drop in the culture density as compared to infection with  
211 heat-killed phage. As expected, the *cps2* strain remained resistant. On the other hand, the  
212 majority of clones (42/61 total, ~69%) of the other four strains regained susceptibility (**Table 1**),  
213 suggesting that resistance to this phage is not caused by a permanent genetic alteration in most  
214 cases.

215

### 216 **Phage resistant wild-type *B. thetaiotaomicron* populations exhibit altered *cps* locus** 217 **expression**

218 Given that CPS type is correlated with resistance to phage infection (e.g., ARB25 fails to  
219 infect strains expressing CPS2 or CPS3 under all conditions tested), we hypothesized that wild-  
220 type *B. thetaiotaomicron* cells inherently expressing resistant capsules would be positively  
221 selected in the presence of phage. To test this, we infected wild-type *B. thetaiotaomicron* with  
222 ARB25 and monitored bacterial growth. For cells treated with a high MOI (MOI  $\approx$  1), culture  
223 turbidity increased very slightly, declined before 3 hours after infection, and finally increased  
224 again to ultimately achieve a high growth level as previously observed (**Figure 4A**).

225 Interestingly, bacterial cultures originating from different single colonies displayed variable  
226 growth kinetics and possibly resistance frequency to ARB25, with the growth of one clone  
227 barely delayed by treatment with live ARB25. Next, we measured if infection with ARB25  
228 resulted in a change in CPS expression by the phage-resistant *B. thetaiotaomicron* population. In  
229 support of our hypothesis, *B. thetaiotaomicron* exposed to heat-killed phage predominantly  
230 expressed genes encoding CPS3 and CPS4, which we typically observe in *in vitro* culture.  
231 Treatment with live ARB25 resulted in a dramatic loss of *cps1* and *cps4* expression (capsules for  
232 which combined loss eliminates ARB25 infection, **Figure 2F**), with a concomitant increase of  
233 expression of the non-permissive *cps3* (**Figure 4B**). Similar growth and expression phenotypes  
234 occurred in cultures treated with a low MOI (MOI  $\approx 10^{-4}$ ), albeit with higher culture turbidity  
235 before a decline and subsequent resumption of growth (**Figure S4**). Dirichlet regression (see  
236 *Methods*) supported significant *cps* expression changes for *cps1*, *cps3*, and *cps4* in response to  
237 ARB25 ( $p < 0.01$  for experiments with both low and high MOI). Notably, the most resistant of  
238 the three bacterial clones (as evidenced by faster outgrowth post-infection) in each of the two  
239 experiments (low and high MOI) exhibited similar *cps* expression to the other clones after  
240 treatment with live phage, but expressed lower levels of permissive *cps1* and *cps4* and higher  
241 levels of non-permissive *cps3* in heat-killed phage treatment groups (**Figure S5**). This alteration  
242 in expression of permissive and non-permissive CPS may contribute to the ability of these clones  
243 to resume growth more rapidly after phage challenge because it was already skewed towards  
244 expression of non-permissive CPS.

245

246 **Multiple layers of phase-variable resistance functions equip *B. thetaiotaomicron* to survive**  
247 **phage predation**

248           The results described above support a model in which some individual cells within a *B.*  
249 *thetaitotaomicron* population are pre-adapted to resist eradication by a single phage like ARB25  
250 through expression of different CPS. Complex phase-variation mechanisms have already been  
251 described in controlling CPS expression in *B. thetaitotaomicron* and *B. fragilis*<sup>4,23,28</sup> and we  
252 demonstrate the ability of CPS to dictate interactions between phages and *B. thetaitotaomicron*  
253 (**Figures 1, 2, 3**). However, in acapsular *B. thetaitotaomicron* infected with ARB25, we observed  
254 significant growth after initial lysis that frequently regained susceptibility when isolated from  
255 and subsequently re-challenged with ARB25 (**Figure 3, Table 1**), suggesting the emergence of a  
256 transiently phage-resistant subpopulation in the absence of CPS. To determine if additional  
257 phage resistance mechanisms are involved, we performed whole genome transcriptional profiling  
258 by RNA-sequencing (RNA-seq) to measure transcriptional differences between ARB25 post-  
259 infected and mock-infected *B. thetaitotaomicron*. In a wild-type *B. thetaitotaomicron* population,  
260 in which cells retain the ability to phase-vary expression of their eight different CPS, the  
261 transcriptional profiles of bacterial populations surviving after ARB25 infection (n=3) were  
262 largely characterized by decreased gene expression: among a total of 56 genes that exhibited  
263 significant expression differences  $\geq 3$ -fold between *B. thetaitotaomicron* exposed to live and heat-  
264 killed ARB25, 51 genes were decreased in post-infected bacteria (**Figure 5A, Table S2**). Most  
265 of these genes with decreased transcription (44/51) belong to the loci encoding CPS1 and CPS4,  
266 consistent with our findings by qPCR that lower expression of these CPS occurs after ARB25  
267 challenge (**Figure 4B**). Correspondingly, increased expression of genes encoding CPS2 and  
268 CPS3 was also apparent by RNA-seq, but did not reach statistical significance. Interestingly, two  
269 additional gene clusters encoding different outer-membrane “Sus-like systems”, which are well-  
270 described Bacteroidetes mechanisms for import and degradation of carbohydrates and other

271 nutrients<sup>2,29</sup>, were also decreased in post-infected bacteria (6/7 remaining non-*cps* genes). The  
272 central features of these systems are outer membrane TonB-dependent transporters (similar to *E.*  
273 *coli* TonA, or **T** one phage receptor **A**; the first described phage receptor<sup>30</sup>), suggesting the  
274 possibility that the proteins encoded by these genes are part of the receptor for ARB25.

275 To further investigate CPS-independent mechanisms that allow *B. thetaiotaomicron* to  
276 avoid eradication by phage, we performed identical RNA-seq experiments on acapsular *B.*  
277 *thetaitotaomicron* populations exposed to heat-killed or live ARB25. In this case, we  
278 hypothesized that eliminating the ability to phase vary capsules would better reveal the  
279 mechanism(s) that allows the acapsular strain to survive ARB25 predation, possibly by further  
280 reducing expression of putative phage receptors like the Sus-like systems identified above.  
281 Expression of the same two Sus-like systems (*BT2170-73*, *BT2365*) that were decreased in  
282 ARB25-exposed wild-type were also decreased to similar levels in acapsular *B. thetaiotaomicron*  
283 (**Figure 5B**). Otherwise, the transcriptional profiles of acapsular *B. thetaiotaomicron* surviving  
284 after ARB25 infection (n=3) were largely characterized by increased gene expression: 71 of the  
285 81 genes differentially regulated  $\geq 3$ -fold between ARB25-infected and the heat-killed reference  
286 showed increased expression in ARB25 post-infected cells. All but 3 of these genes were unique  
287 to the post-infection transcriptome of acapsular *B. thetaiotaomicron* compared to wild-type *B.*  
288 *thetaitotaomicron* (**Figure 5B**, **Table S2**).

289 Among the 71 genes with increased expression in post-infected acapsular *B.*  
290 *thetaitotaomicron*, 24 genes were part of 8 different gene clusters that encode putative tyrosine  
291 recombinases along with pairs of outer membrane lipoproteins and OmpA  $\beta$ -barrel proteins  
292 (**Figure 5C**). One of these genes (*BT1927*) was previously characterized as encoding a phase-  
293 variable, S-layer protein, which organizes into a tessellated structure on the cell surface and

294 when locked into the “on” orientation promoted increased *B. thetaiotaomicron* resistance to  
295 complement-mediated killing<sup>31</sup>. The remaining 7 gene clusters share both syntenic organization  
296 and homology to this original S-layer gene cluster. Closer scrutiny of the promoter regions  
297 upstream of the 7 newly identified gene clusters encoding putative lipoproteins revealed that  
298 each is also flanked by a pair of imperfect, 17 nucleotide palindromic repeats (**Figure 5C**). Three  
299 of these newly identified repeats are identical to the repeats known to mediate recombination at  
300 the *BT1927* promoter<sup>31</sup>. The remaining 4 sequences only varied by the sequence of a  
301 trinucleotide located in the middle of each imperfect palindrome (colored blocks in **Figure 5C**  
302 middle). Finally, amplicon sequencing of each promoter supported the existence of the proposed  
303 recombination events in 5 of the 7 newly identified loci (**Figure S6**).

304         Among the remaining genes that were significantly up- or down-regulated in post  
305 ARB25-infected acapsular *B. thetaiotaomicron*, there was an additional signature of genes for  
306 which DNA recombination may be involved in re-organizing expression of cell surface proteins.  
307 Specifically, the expression of 3 of 4 genes in an operon (*BT1042-45*) previously implicated in  
308 utilization of host glycans<sup>32</sup> were expressed an average of 6.9-fold less in ARB25-infected  
309 acapsular cells compared to heat-killed controls. Correspondingly, 5 genes in an adjacent operon  
310 (*BT1046-51*) with similar arrangement and predicted functions exhibited an average of 8.3-fold  
311 increased expression in acapsular *B. thetaiotaomicron* exposed to live ARB25. Both of these  
312 operons have been previously linked to transcriptional regulation by a nearby extra-cytoplasmic  
313 function sigma (ECF- $\sigma$ ), anti- $\sigma$  factor pair, such that when the single ECF- $\sigma$  coding gene  
314 (*BT1053*) is deleted, the ability to activate the adjacent operons is eliminated<sup>33</sup>. Based on 1) the  
315 ARB25-dependent shift in gene expression described above; 2) previously established common  
316 ECF- $\sigma$  regulation of the *BT1042-45* and *BT1046-51* operons; 3) the observation that two genes

317 encoding TonB-dependent transporters (*BT1040*, *BT1046*) appear to be truncated at their 5' ends  
318 compared to *BT1042* (**Figure 4, S7A**) and only the full-length *BT1042* sequence harbors a  
319 required anti- $\sigma$  contact domain<sup>33</sup>; and 4) annotation of a gene encoding a putative tyrosine  
320 recombinase (*BT1041*) located in the middle of this locus, we hypothesized that this gene cluster  
321 possesses the ability to undergo recombination and that specific combinatorial variants are  
322 selected under phage pressure.

323 To test this hypothesis, we designed PCR primer pairs (**Figure 5D**, green dumbbells) to  
324 detect both the originally annotated sequence orientation and 3 potential alternative  
325 recombination states derived from either moving the full-length 5' end of *BT1042* to one of two  
326 alternative *susC*-like genes or an internal rearrangement derived from recombination of two  
327 incomplete *susC*-like genes (**Figure 5D**, variants 1-3). In support of our hypothesis, we were  
328 able to detect by both PCR (**Figure 5E**) and amplicon sequencing (**Figure S7B**) the presence of  
329 all 5 predicted alternative recombination states (**Figure 5D,E** amplicons 2, 3, 4, 6, 7), plus the 3  
330 expected from the originally published genome assembly<sup>34</sup>. In further support of our hypothesis,  
331 an insertion mutation in the associated tyrosine recombinase-coding gene (*BT1041*) locked the  
332 corresponding mutant into the native genomic architecture as determined by the presence of  
333 amplicon 1, but the absence of amplicons 2 and 3 (**Figure 5E**). Further sequence analysis and  
334 tracking of single nucleotide polymorphisms in the 5' ends of the three recombinationally active  
335 *susC*-like genes narrowed the recombination site down to a 7 bp sequence that is flanked by an  
336 imperfect direct repeat encompassing over 132 additional downstream bp that may also influence  
337 recombination specificity (**Figure S7B**). Thus, three separate operons that are under the  
338 transcriptional control of a single ECF- $\sigma$  regulator and are involved in utilization of host glycans,  
339 are also able to undergo recombinational shuffling via a tyrosine recombinase/direct repeat

340 mediated mechanism to vary which of the three operons is expressed to produce its  
341 corresponding surface proteins. This strategy is similar to recombinational shufflons involving  
342 nutrient utilization functions that have been characterized in *B. fragilis*<sup>35,36</sup>, with the exception  
343 that in the example described here, recombination occurs between direct repeats instead of  
344 palindromes. One explanation for this phenomenon is that shufflons evolved to subvert phage  
345 infection by expressing alternate cell surface receptors for important nutrients, which are also  
346 targeted by phages. Contrary to this hypothesis that the proteins encoded by BT1042-45 might  
347 serve as a receptor for ARB25, elimination of the genes spanning BT1033-52 did not eliminate  
348 ARB25 infection in the acapsular strain, suggesting that an additional or different receptor(s)  
349 exists. Interestingly, the BT1033-52 mutant exhibited variable plaquing efficiency compared to  
350 the acapsular parent (**Figure S8**), suggesting that loss of these genes could exert global effects that  
351 mediate susceptibility to ARB25.

352         Since the gene encoding the original outer membrane S-layer protein (*BT1927*), and its  
353 downstream gene (*BT1926*), were among the most highly activated (147- and 114-fold,  
354 respectively) in post-infected, acapsular *B. thetaiotaomicron*, and can be alternatively locked into  
355 the “on” or “off” orientations by mutating the recombination site upstream of the phase-variable  
356 promoter<sup>31</sup>, we chose to focus on the role of this single function in resisting phage infection. We  
357 re-engineered acapsular *B. thetaiotaomicron* to contain locked “on” and locked “off” versions of  
358 this promoter and evaluated sensitivity to ARB25 and another phage, SJC01, which has a similar  
359 infection profile on *B. thetaiotaomicron* (**Figure 1**). Consistent with the observation that S-layer  
360 is highly activated in acapsular *B. thetaiotaomicron* infected with ARB25, acapsular S-layer  
361 “off” cells were more effectively killed in the presence of live phage relative to acapsular S-layer  
362 “on” cells (**Figure 6A**). Interestingly, SJC01 showed the opposite effect, as it more effectively



363 killed cells with S-layer locked “on” versus cells with S-layer locked “off” (**Figure 6B**). These  
364 data indicate that in addition to the 8 surface-exposed capsular polysaccharide types, S-layer  
365 lipoproteins can function as positive or negative determinants of phage tropism in *B.*  
366 *thetaitoaomicron*. Finally, the observation that CPS<sup>5,6</sup> and homologous S-layer like functions are  
367 broadly represented in gut Bacteroidetes<sup>31</sup>, suggest that these two mechanisms help to diversify  
368 members of this phylum under phage-mediated selection.

369

## 370 **Discussion**

371 Production of multiple phase-variable CPS is a hallmark of human gut Bacteroidetes.  
372 Previous work has revealed the importance of *Bacteroides* CPS in interactions with the host  
373 immune system<sup>4,8,37,38</sup>. However, other biological roles for *Bacteroides* CPS remain relatively  
374 unexplored. Using a panel of *B. thetaitoaomicron* strains that express individual CPS, we tested a  
375 previously inaccessible hypothesis: that *Bacteroides*-targeting phage can be both inhibited and  
376 assisted by the repertoire of capsules expressed by their host bacteria. Our data clearly indicate  
377 that production of specific CPS is associated with alterations in phage susceptibility, which is  
378 underscored by the observation that none of the 71 phages characterized here infect every CPS-  
379 variable strain that we tested (**Figure 1**). Phage-mediated selection and interactions with the host  
380 immune system help to explain both the extensive diversification of CPS structures in gut-  
381 resident Bacteroidetes<sup>4,12</sup> and their complex phase-variable regulation mechanisms within a  
382 given strain or species<sup>23,25</sup>. Surprisingly, our results also reveal that additional phase variable  
383 markers are expressed by *B. thetaitoaomicron* under phage-mediated selection, highlighting that  
384 other strategies exist in *Bacteroides* for surviving in the face of phage predation.

385           There are several mechanisms through which CPS could promote or prevent phage  
386 infection. First, CPS may sterically mask surface receptors to block phage binding, although  
387 additional specificity determinants must be involved because no individual phage that infects the  
388 acapsular strain is blocked by all single *B. thetaiotaomicron* CPS. These specificity determinants  
389 could be driven by CPS structure (physical depth on the cell surface, polysaccharide charge,  
390 permeability) or be actively circumvented by the presence of polysaccharide depolymerases on  
391 the phage particles, as has been described in other phage-bacterium systems (e.g., *E. coli* K1 and  
392 phiK1-5<sup>39</sup>). Alternatively, certain permissive CPS could serve as obligate receptors<sup>40</sup> (i.e., phage  
393 that do not infect acapsular) or more generally increase the affinity of a phage for the bacterial  
394 cell surface – similar to what has been proposed in the “bacteriophage adhering to mucus”  
395 model, whereby hypervariable domains on phage capsids facilitate adherence to mucus and  
396 increase the frequency of bacteria-phage interaction<sup>41</sup>. This latter type of adherence to CPS might  
397 increase the likelihood that a phage would contact its receptor by sustained interaction with the  
398 extracellular matrix. Some combination of these possibilities is likely to explain the host range  
399 infection profile for the majority of the phages in our collection. Collectively, our observations  
400 provide the foundation for future mechanistic work, beginning with phage genome sequencing,  
401 aimed at understanding the physical and chemical interactions that mediate infection of *B.*  
402 *thetaiotaomicron* and other *Bacteroides* by their phages.

403           Using ARB25 as a representative from our larger collection, we demonstrate that  
404 infection with this single phage does not fully eradicate presumably susceptible *B.*  
405 *thetaiotaomicron* populations. Rather, resistant cells grow, often quickly, after what we interpret  
406 to be an initial lytic event (**Figure 3**). Similar observations were previously made with  
407  $\Phi$ Crass001, a phage that infects *B. intestinalis*<sup>21</sup>. Specifically, though  $\Phi$ Crass001 robustly

408 formed plaques on lawns of *B. intestinalis*, it failed to eradicate this bacterium in liquid culture.  
409 We hypothesize that  $\Phi$ Crass001 undergoes lytic growth on a subset of *B. intestinalis* cells  
410 expressing permissive CPS. Subsequently, clones expressing resistant CPS would grow to  
411 dominate a culture after phage challenge, as we observed with ARB25.

412         Given the roles of CPS in mediating *B. thetaiotaomicron*-phage interactions, the  
413 outgrowth of a phage resistant sub-population was especially surprising in the context of  
414 acapsular *B. thetaiotaomicron*. While wild-type *B. thetaiotaomicron* primarily appears to survive  
415 continued ARB25 predation by pre-adaptive CPS variation or by shifting the population to  
416 express non-permissive CPS, the acapsular strain instead shifts to increased expression of phase-  
417 variable sets of surface proteins, at least one of which (*BT1927-26*) confers increased resistance  
418 to ARB25 when locked “on” in acapsular *B. thetaiotaomicron*. A previous study measured that  
419 only 1:1000 *B. thetaiotaomicron* cells in an unchallenged population express the S-layer encoded  
420 by *BT1927*<sup>31</sup>. Given that ARB25 non-permissive CPS can comprise up to 40% of the expressed  
421 capsule population (e.g., CPS3 in **Figure 4B**), the rapid emergence of cells expressing alternative  
422 CPS could be explained by this frequency difference, in which case S-layer expressing wild-type  
423 bacteria might also emerge given longer phage exposure times. The original *B. thetaiotaomicron*  
424 S-layer study also demonstrated that locking the invertible promoter for the *BT1927* S-layer into  
425 the “on” orientation facilitated survival against complement-mediated killing<sup>31</sup>, suggesting that  
426 orthogonal roles for this and related proteins exist in *B. thetaiotaomicron* and likely facilitate  
427 survival in the face of diverse environmental disturbances. Combined with our data on CPS-  
428 mediated phage tropism, our observations that the *BT1927*-encoded S-layer confers resistance to  
429 some phages, that 7 other homologous systems are also upregulated after exposure to ARB25,  
430 and that a shufflon harboring three recombinationally-variable nutrient acquisition operons exists

431 in *B. thetaiotaomicron*, together reveal that there are at least 17 independent cell surface  
432 structures in *B. thetaiotaomicron* that could be altered in cells exposed to phages. The fact that  
433 almost all of these surface structures (14/17) are under the control of independent phase-variable  
434 promoters with associated tyrosine recombinases<sup>4,31,36</sup> and that their products show altered  
435 expression after phage exposure speaks to the effectiveness of this strategy in pre-adapting some  
436 *B. thetaiotaomicron* cells within a population to thrive in the face of phage predation.

437 Phages are the most abundant biological entities in the gut microbiome<sup>41</sup> and interest in  
438 the roles and identities of these gut-resident viruses is increasing as metagenomic sequencing  
439 approaches are unveiling a more comprehensive view of their dynamics during health and  
440 disease<sup>16,17,42</sup>. Although sequence-based approaches are powerful for describing the phages that  
441 are present, they do not generate information on the definitive hosts or the mechanisms of  
442 individual bacteria-phage interactions, which are likely to be elaborate. These limitations will  
443 prohibit full dissection of the ecological interactions that phage exert on bacterial populations in  
444 the gut. The approach taken here of isolating phages for a particular host of interest, with added  
445 layers of detail like systematic variation of surface CPS when possible, will be an essential  
446 complement to high throughput sequencing studies and will help build a foundation of  
447 mechanistic gut bacterium-phage interactions.

448 Our results, with a single strain of bacteria commonly found in human gut microbiomes,  
449 point to the existence of a very complex relationship between bacteria and phage in the gut  
450 microbiome. Considering the possibilities that these interactions could vary over time, differ by  
451 host species, and evolve differently within individuals or regionally distinct global populations,  
452 the landscape becomes even more complex. Given the diverse adaptive and counter-adaptive  
453 strategies that have apparently evolved in the successful gut symbiont *B. thetaiotaomicron* and

454 its relatives, our findings hold important implications for the use of phages to intentionally alter  
455 the composition or function of the gut microbiota. While a cocktail of multiple phages could  
456 theoretically be harnessed together to elicit more robust alteration of target populations within a  
457 microbiome, the complexity of host tropisms and bacterial countermeasures that exist for *B.*  
458 *thetaiotaomicron* imply that a deliberate selection of complementary phage would be needed. If  
459 selections of effective phage cocktails need to be further tailored to individual microbiomes, or  
460 elicit resistance within individuals or populations the way antibiotics do, the prospects for  
461 effective gut microbiome-targeting phage therapy could indeed become very complicated. Given  
462 these considerations, our findings here contribute an important early step towards building a deep  
463 functional understanding of the bacterium-virus interactions that occur in the human gut  
464 microbiome. As such, this work contributes to the overall goal of understanding the ecology of  
465 this important microbial community and developing rational approaches to shape its physiology.

466

## 467 **Methods**

### 468 ***Bacterial strains and culture conditions.***

469 The bacterial strains used in this study are listed in **Table S3**. Frozen stocks of these  
470 strains were maintained in 25% glycerol at -80°C and were routinely cultured in an anaerobic  
471 chamber or in anaerobic jars (using GasPak EZ anaerobe container system sachets w/indicator,  
472 BD) at 37°C in *Bacteroides* Phage Recovery Medium (BPRM), as described previously<sup>43</sup>: per 1  
473 liter of broth, 10 g meat peptone, 10 g casein peptone, 2 g yeast extract, 5 g NaCl, 0.5 g L-  
474 cysteine monohydrate, 1.8 g glucose, and 0.12 g MgSO<sub>4</sub> heptahydrate were added; after  
475 autoclaving and cooling to approximately 55 °C, 10 ml of 0.22 µm-filtered hemin solution (0.1%  
476 w/v in 0.02% NaOH), 1 ml of 0.22 µm-filtered 0.05 g/ml CaCl<sub>2</sub> solution, and 25 ml of 0.22µm-

477 filtered 1 M Na<sub>2</sub>CO<sub>3</sub> solution were added. For BPRM agar plates, 15 g/L agar was added prior to  
478 autoclaving and hemin and Na<sub>2</sub>CO<sub>3</sub> were added as above prior to pouring the plates. For BPRM  
479 top agar used in soft agar overlays, 3.5 g/L agar was added prior to autoclaving. Hemin, CaCl<sub>2</sub>,  
480 and Na<sub>2</sub>CO<sub>3</sub> were added to the top agar as above immediately before conducting experiments.  
481 Bacterial strains were routinely struck from the freezer stocks onto agar plates of Brain Heart  
482 Infusion supplemented with 10% horse blood (Quad Five, Rygate, Montana) (BHI-blood agar; or  
483 for the SJC phages used in **Figure 1**, on BPRM agar) and grown anaerobically for up to 3 days.  
484 A single colony was picked for each bacterial strain, inoculated into 5 mL BPRM, and grown  
485 anaerobically overnight to provide the starting culture for experiments.

486 For the experiment described in **Figure 2G**, liquid cultures of *B. thetaiotaomicron* were  
487 grown in BPRM using the pyrogallol method as described previously<sup>4</sup>. Briefly, a sterile cotton  
488 ball was burned and then pushed midway into the tube, after which 200 µl of saturated NaHCO<sub>3</sub>  
489 and 200 µl of 35% pyrogallol solution were added to the cotton ball. A rubber stopper was used  
490 to seal the tubes, and tubes were incubated at 37 °C.

491

#### 492 ***Bacteriophage isolation from primary wastewater effluent.***

493 The bacteriophages described in this study were isolated from primary wastewater  
494 effluent from two locations at the Ann Arbor, Michigan Wastewater Treatment Plant and from  
495 the San Jose-Santa Clara Regional Wastewater Treatment Facility. After collection, the primary  
496 effluent was centrifuged at 5,500 rcf for 10 minutes at room temperature to remove any  
497 remaining solids. The supernatant was then sequentially filtered through 0.45 µm and 0.22 µm  
498 polyvinylidene fluoride (PVDF) filters to yield “processed primary effluent.” Initial screening for  
499 plaques was done using a soft agar overlay method<sup>44</sup> where processed primary effluent was

500 combined with 1 part overnight culture to 9 parts BPRM top agar and poured onto a BPRM agar  
501 plate (e.g. 0.5 mL overnight culture and 4.5 mL BPRM top agar was used for standard circular  
502 petri dishes [100 mm x 15 mm]). Soft agar overlays were incubated anaerobically at 37 °C  
503 overnight. Phages were successfully isolated using three permutations of this assay: (1) Direct  
504 plating, where processed primary effluent was directly added to overnight culture prior to  
505 plating. (2) Enrichment, where 10 mL processed primary effluent was mixed with 10 mL  
506 2XBPRM and 3 mL exponential phase *B. thetaiotaomicron* culture and grown overnight. The  
507 culture was centrifuged at 5500 rcf for 10 minutes and filtered through a 0.22 µm PVDF filter.  
508 (3) Size exclusion, where processed primary effluent was concentrated up to 500-fold via 30 or  
509 100 kDa PVDF or polyethersulfone size exclusion columns. Up to 1 mL of processed primary  
510 effluent, enrichment, or concentrated processed primary effluent was added to the culture prior to  
511 adding BPRM top agar, as described above. To promote a diverse collection of phages, no more  
512 than 5 plaques from the same plate were plaque purified and a diversity of plaque morphologies  
513 were selected as applicable. When using individual enrichment cultures, only a single plaque was  
514 purified.

515         Single, isolated plaques were picked into 100 µL phage buffer (prepared as an autoclaved  
516 solution of 5 ml of 1 M Tris pH 7.5, 5 ml of 1 M MgSO<sub>4</sub>, 2 g NaCl in 500 ml with ddH<sub>2</sub>O).  
517 Phages were successfully plaque purified using one of two methods: (1) a standard full plate  
518 method, where the diluted phage samples were combined with *B. thetaiotaomicron* overnight  
519 culture and top agar and plated via soft agar overlay as described above or (2) a higher  
520 throughput 96-well plate-based method, where serial dilutions were prepared in 96-well plates  
521 and 1 µL of each dilution was spotted onto a solidified top agar overlay. This procedure was

522 repeated at least 3 times to plaque purify each phage. For more details on the phages isolated in  
523 this work, see **Figure S1**.

524 High titer phage stocks were generated by flooding a soft agar overlay that plate yielded a  
525 “lacey” pattern of bacterial growth (near confluent lysis). Following overnight incubation of each  
526 plate, 5 ml of sterile phage buffer was added to the plate to resuspend the phage. After at least 2  
527 hours of incubation at room temperature, the lysate was spun at 5,500 rcf for 10 minutes to clear  
528 debris and then filter sterilized through a 0.22  $\mu\text{m}$  PVDF filter.

529

### 530 *Quantitative host range assays.*

531 To accommodate the large number of phage isolates in our collection, we employed a  
532 spot titer assay for semi-quantitative comparisons of infectivity on each bacterial strain. High  
533 titer phage stocks were prepared on their “preferred host strain,” which was the strain that  
534 yielded the highest titer of phages in a pre-screen of phage host range. Lysates were then diluted  
535 to approximately  $10^6$  PFU/mL, were added to the wells of a 96-well plate, and further diluted to  
536  $10^5$ ,  $10^4$ , and  $10^3$  PFU/mL using a multichannel pipettor. One microliter of each of these  
537 dilutions was plated onto solidified top agar overlays containing single bacterial strains indicated  
538 in each figure. After spots dried, plates were incubated anaerobically for 15-24 hours prior to  
539 counting plaques. Phage titers were normalized to the bacterial strain that typically exhibited the  
540 highest phage titer, which was designated as the “preferred host strain”.

541

### 542 *Images of phage plaques.*

543 To document the morphologies of plaques formed by the purified phages, two sets of  
544 plaque pictures were taken: the first set were taken with a Color QCount Model 530 (Advanced



545 Instruments) with a 0.01 second exposure. Images were cropped to 7.5 mm<sup>2</sup> but were otherwise  
546 unaltered. The second set of images were taken on a ChemiDoc Touch instrument (BioRad) with  
547 a 0.5 second exposure. Images were cropped to 7.5 mm<sup>2</sup> and background unnaturally high pixels  
548 were removed (Image Lab, BioRad) to facilitate viewing of the plaques.

549

#### 550 *Incubation of phage with extracted CPS.*

551 Approximately 50-100 PFU of ARB25 in 50 µl phage buffer were mixed with an equal  
552 volume of H<sub>2</sub>O or capsule (2 mg/ml) extracted by the hot water-phenol method (as described in  
553 Reference 4) and incubated at 37 °C for 30 minutes. Samples were then plated on the acapsular  
554 strain, and plaques were counted after 15-24 hours anaerobic incubation at 37 °C. Counts from  
555 two replicates on the same day were then averaged, and the experiment was performed three  
556 times.

557

#### 558 *Growth curves.*

559 For growth curve experiments, 3 individual clones of each indicated strain were picked  
560 from agar plates and grown overnight in BPRM. Then, for experiments in **Figures 3 and 6**, each  
561 clone was diluted 1:100 in fresh BPRM and 100 µl was added to a microtiter plate. 10 µl of  
562 approximately 5\*10<sup>6</sup> PFU/ml live or heat-killed phage were added to each well, plates were  
563 covered with an optically clear gas-permeable membrane (Diversified Biotech, Boston, MA) and  
564 optical density at 600 nm (OD<sub>600</sub>) values were measured using an automated plate reading device  
565 (BioTek Instruments). Phages were heat killed by heating to 95 °C for 30 minutes, and heat-  
566 killed phage had no detectable PFU/ml with a limit of detection of 100 PFU/ml.

567 In **Figure S3B**, wild-type *B. thetaiotaomicron* was infected with live or heat-killed  
568 ARB25, and bacterial growth was monitored via optical density at 600 nm (OD<sub>600</sub>) on an  
569 automated plate reader for 12 hours. At 0, 6.02, 8.36, and 11.7 hours post inoculation, replicate  
570 cultures were vortexed in 1:5 volume chloroform, centrifuged at 5,500 rcf at 4 °C for 10 minutes,  
571 and the aqueous phase was titered on the acapsular strain. No phages were detected in heat-killed  
572 controls.

573

574 ***Generation of phage-free bacterial isolates and determination of their phage susceptibility.***

575 To isolate phage-free bacterial clones from ARB25-infected cultures (Table 1), each  
576 culture was streaked on a BHI-blood agar plate. Eighteen individual colonies were picked from  
577 each plate, and each of these clones was re-streaked onto a new BHI-blood agar plate. One  
578 colony was picked from each of these secondary plates and was inoculated into 150 µl BPRM  
579 broth and incubated anaerobically at 37 °C for 2 days. Only one of the clones (a *cps4* isolate)  
580 failed to grow in liquid media. To determine whether cultures still contained viable phage, 50 µl  
581 of each culture was vortexed with 20 µl chloroform, then centrifuged at 5,500 rcf for 10 minutes.  
582 10 µl of the lysate was spotted on BPRM top agar containing naïve acapsular bacteria and was  
583 incubated anaerobically overnight at 37 °C. Loss of detectable phage in the twice passaged  
584 clones was confirmed for most of the clones (79/89, 89%) by the absence of plaques on the naïve  
585 acapsular strain.

586 To determine whether the resultant phage-free plaques were resistant to ARB25 infection,  
587 each culture was diluted 1:100 in fresh BPRM, 100 µl was added to a microtiter plate, and 10 µl  
588 of either live or heat-killed ARB25 (approximately 5\*10<sup>6</sup> PFU/ml) was added. Plates were  
589 incubated anaerobically at 37 °C for 48 hours, and OD<sub>600</sub> was measured as described above.

590 Cultures were determined to be susceptible to ARB25 by demonstration of delayed growth or  
591 drop in OD<sub>600</sub>, as compared to heat-killed controls.

592

593 ***Measurement of cps gene expression.***

594 For **Figures 2G, 4, and S4**, overnight cultures were subcultured into fresh BPRM to an  
595 OD<sub>600</sub> of 0.01. For Figure 4B, 200 µL of approximately 2 x 10<sup>8</sup> PFU/mL live phage or heat killed  
596 phage were added to 5 mL of the diluted cultures. For **Figure S4**, 200 µL of approximately 2 x  
597 10<sup>5</sup> PFU/mL live phage or heat killed phage were added to 5 mL of the diluted cultures. Bacterial  
598 growth was monitored by measuring OD<sub>600</sub> every 15-30 minutes using a GENESYS 20  
599 spectrophotometer (Thermo Scientific). Cultures were briefly mixed by hand before each  
600 measurement. For determination of relative *cps* gene expression, cultures were grown to OD<sub>600</sub>  
601 0.6-0.8, were centrifuged at 7700 rcf for 2.5 minutes, the supernatant was decanted, and the  
602 pellet was immediately resuspended in 1 ml RNA-Protect (Qiagen). RNA-stabilized cell pellets  
603 were stored at -80 °C.

604 Total RNA was isolated using the RNeasy Mini Kit (Qiagen) then treated with the  
605 TURBO DNA-free Kit (Ambion) followed by an additional isolation using the RNeasy Mini Kit.  
606 cDNA was then synthesized using SuperScript III Reverse Transcriptase (Invitrogen) according  
607 to the manufacturer's instructions using random oligonucleotide primers (Invitrogen). qPCR  
608 analyses for *cps* locus expression were performed on a Mastercycler ep realplex instrument  
609 (Eppendorf). Expression of each of the 8 *cps* synthesis loci was quantified using primers to a  
610 single gene in each locus (primers are listed in **Table S4**) and normalized to a standard curve of  
611 DNA from wild-type *B. thetaiotaomicron*. Relative abundance of expression for each locus was  
612 then calculated. A custom-made SYBR-based master mix was used for qPCR: 20 µl reactions

613 were made with ThermoPol buffer (New England Biolabs), and containing 2.5 mM MgSO<sub>4</sub>,  
614 0.125 mM dNTPs, 0.25 μM each primer, 0.1 μl of a 100 X stock of SYBR Green I (Lonza), and  
615 500 U Hot Start *Taq* DNA Polymerase (New England Biolabs). 10 ng of cDNA was used for  
616 each sample, and samples were run in duplicate. A touchdown protocol with the following  
617 cycling conditions was used for all assays: 95 °C for 3 minutes, followed by 40 cycles of 3  
618 seconds at 95 °C, 20 seconds of annealing at a variable temperature, and 20 seconds at 68 °C.  
619 The annealing temperature for the first cycle was 58 °C, then dropped one degree each cycle for  
620 the subsequent 5 cycles. The annealing temperature for the last 34 cycles was 52 °C. These  
621 cycling conditions were followed by a melting curve analysis to determine amplicon purity.

622

### 623 ***Transcriptomic analysis of B. thetaiotaomicron after phage infection.***

624 Whole genome transcriptional profiling of wild-type and acapsular *B. thetaiotaomicron*  
625 infected with live or heat-killed ARB25 was conducted using total bacterial RNA that was  
626 extracted the same as described above (Qiagen RNeasy, Turbo DNA-free kit) and then treated  
627 with Ribo-Zero rRNA Removal Kit (Illumina Inc.) and concentrated using RNA Clean and  
628 Concentrator -5 kit (Zymo Research Corp, Irvine, CA). Sequencing libraries were prepared using  
629 TruSeq barcoding adaptors (Illumina Inc.), and 24 samples were multiplexed and sequenced with  
630 50 base pair single end reads in one lane of an Illumina HiSeq instrument at the University of  
631 Michigan Sequencing Core. Demultiplexed samples were analyzed via Arraystar software  
632 (DNASTAR, Inc.) using RPKM normalization and the default parameters. Changes in gene  
633 expression in response to live ARB25 infection were determined by comparison to the heat-  
634 killed reference: retained were genes with  $\geq 3$ -fold expression changes up or down, Benjamini-  
635 Hochberg corrected  $P$  value  $\leq 0.05$ , and genes for which the lower value in the fold-change

636 calculation was at least 1% of the mean RPKM-normalized value for all genes in the  
637 transcriptome. The latter cutoff was implemented to reduce the noise effects of changes in genes  
638 with very low expression values.

639

#### 640 ***PCR and sequencing of phase variable *B. thetaiotaomicron* chromosomal loci.***

641 We found that each of the 8 chromosomal loci shown in **Figure 5C** had nearly identical  
642 301 bp promoter sequences, including both of the imperfect palindromes that we predict to  
643 mediate recombination and the intervening sequence at each locus. While the 8 S-layer genes  
644 and the 7/8 of the upstream regions encoding putative tyrosine recombinases (all but the BT1927  
645 region) shared significant nucleotide identity, we were able to design primers that were specific  
646 to regions upstream and downstream of each invertible promoter and used these to generate an  
647 amplicon for each locus that spanned the predicted recombination sites. After gel extracting a  
648 PCR product of the expected size for each locus, which should contain promoter orientations in  
649 both the “on” and “off” orientations, we performed a second PCR using a universal primer that  
650 lies within the 301 bp sequence of each phase-variable promoter and extended to unique primers  
651 that anneal within each S layer protein encoding gene. Bands of the expected size were excised  
652 from agarose gels, purified and sequenced using the primer that anneals within each S layer  
653 encoding gene to determine if the predicted recombined “on” promoter orientation can be  
654 detected. (Note that the assembled *B. thetaiotaomicron* genome architecture places all of these  
655 promoters in the proposed “off” orientation. We were able to detect 6/8 of these loci in the “on”  
656 orientation in ARB25-treated cells by this method, **Figure S6**.) A similar approach was used to  
657 determine the re-orientation of DNA fragments in the *B. thetaiotaomicron* PUL shufflon shown  
658 in **Figure 5D**, using PCR primer amplicons positioned according to the schematic followed by

659 sequencing with the primer on the “downstream” end of each amplicon according to its position  
660 relative to the shuffled promoter sequence. For a list of primers used see **Table S4**.

661

662 ***Construction of acapsular *B. thetaiotaomicron* S-layer ‘ON’ and S-layer ‘OFF’ mutants.***

663 Acapsular *B. thetaiotaomicron* S-layer ‘ON’ and ‘OFF’ mutants ( $\Delta cps$  BT1927-ON and  
664  $\Delta cps$  BT1927-OFF, respectively) were created using the  $\Delta tdk$  allelic exchange system<sup>45</sup>. To  
665 generate homologous regions for allelic exchange, the primers BT\_1927\_XbaI-DR and  
666 BT\_1927\_SalI-UF were used to amplify the BT1927-ON and BT1927-OFF promoters from the  
667 previously-constructed BT1927-ON and BT1927-OFF strains<sup>31</sup> via colony PCR using Q5 High  
668 Fidelity DNA polymerase (New England Biolabs). Candidate  $\Delta cps$  BT1927-ON and  $\Delta cps$   
669 BT1927-OFF mutants were screened by PCR using the primer pair BT1927\_Diagnostic\_R and  
670 BT1927\_Diagnostic\_F and confirmed by Sanger sequencing using these diagnostic primers. All  
671 plasmids and primers are listed in **Supplementary Tables S3** and **S4**, respectively.

672

673 ***Data representation and statistical analysis.***

674 The heatmaps for **Figures 1** and **S2** and the dendrogram for **Figure 1** were generated in R  
675 using the “heatmap” function. Other graphs were created in Prism software (GraphPad Software,  
676 Inc., La Jolla, CA). Statistical significance in this work is denoted as follows unless otherwise  
677 indicated: \*  $p < 0.05$ ; \*\*  $p < 0.01$ ; \*\*\*  $p < 0.001$ ; \*\*\*\*  $p < 0.0001$ . Statistical analyses other than  
678 Dirichlet regression were performed in Prism. Dirichlet regression was performed in R using the  
679 package “DirichletReg” (version 0.6-3), employing the alternative parameterization as used  
680 previously<sup>4,46</sup>. Briefly, the parameters in this distribution are the proportions of relative *cps* gene  
681 expression and the total *cps* expression, with *cps7* expression used as a reference. The variable of

682 interest used in **Figure 2G** is bacterial strain, whereas the variable of interest used in **Figure 4B**  
683 is phage viability (live versus heat-killed phage). Precision was allowed to vary by group given  
684 this model was superior to a model with constant precision, as determined by a likelihood ratio  
685 test at significance level  $p < 0.05$ .

## 686 687 **Acknowledgements**

688  
689 We thank Rey Honrada at the San Jose-Santa Clara Wastewater Treatment Plant and the staff at  
690 the Ann Arbor Wastewater treatment plant for assistance in collecting primary sewage effluent.  
691 This work was funded by NIH grants (GM099513 and DK096023 to E.C.M), an NIH  
692 postdoctoral NRSA (5T32AI007328 to A.J.H.), a Stanford University School of Medicine  
693 Dean's Postdoctoral Fellowship (A.J.H.), and the NIH Cellular Biotechnology Training Program  
694 (N.T.P., T32GM008353).

## 695 696 **Author Contributions**

697  
698 NTP, AJH, BDM, JOG, and SS performed the experiments. NTP, AJH, and ECM designed the  
699 experiments, and analyzed and interpreted the data. JLS and ECM provided tools and reagents.  
700 NTP, AJH and ECM prepared the display items. NTP, AJH and ECM wrote the paper. All  
701 authors edited the manuscript prior to submission.

## 702 703 **References**

- 704 1 Eckburg, P. B. *et al.* Diversity of the human intestinal microbial flora. *Science (New*  
705 *York, N.Y.)* **308**, 1635-1638, doi:10.1126/science.1110591 (2005).
- 706 2 Cockburn, D. W. & Koropatkin, N. M. Polysaccharide Degradation by the Intestinal  
707 Microbiota and Its Influence on Human Health and Disease. *Journal of molecular*  
708 *biology* **428**, 3230-3252, doi:10.1016/j.jmb.2016.06.021 (2016).
- 709 3 Hooper, L. V., Littman, D. R. & Macpherson, A. J. Interactions between the microbiota  
710 and the immune system. *Science (New York, N.Y.)* **336**, 1268-1273,  
711 doi:10.1126/science.1223490 (2012).
- 712 4 Porter, N. T., Canales, P., Peterson, D. A. & Martens, E. C. A Subset of Polysaccharide  
713 Capsules in the Human Symbiont *Bacteroides thetaiotaomicron* Promote Increased  
714 Competitive Fitness in the Mouse Gut. *Cell host & microbe* **22**, 494-506.e498,  
715 doi:10.1016/j.chom.2017.08.020 (2017).
- 716 5 Donia, M. S. *et al.* A systematic analysis of biosynthetic gene clusters in the human  
717 microbiome reveals a common family of antibiotics. *Cell* **158**, 1402-1414,  
718 doi:10.1016/j.cell.2014.08.032 (2014).
- 719 6 Coyne, M. J. & Comstock, L. E. Niche-specific features of the intestinal bacteroidales.  
720 *Journal of bacteriology* **190**, 736-742, doi:10.1128/jb.01559-07 (2008).
- 721 7 Xu, J. *et al.* Evolution of symbiotic bacteria in the distal human intestine. *PLoS biology* **5**,  
722 e156, doi:10.1371/journal.pbio.0050156 (2007).

- 723 8 Peterson, D. A., McNulty, N. P., Guruge, J. L. & Gordon, J. I. IgA response to symbiotic  
724 bacteria as a mediator of gut homeostasis. *Cell host & microbe* **2**, 328-339,  
725 doi:10.1016/j.chom.2007.09.013 (2007).
- 726 9 Round, J. L. *et al.* The Toll-like receptor 2 pathway establishes colonization by a  
727 commensal of the human microbiota. *Science (New York, N.Y.)* **332**, 974-977,  
728 doi:10.1126/science.1206095 (2011).
- 729 10 Shen, Y. *et al.* Outer membrane vesicles of a human commensal mediate immune  
730 regulation and disease protection. *Cell host & microbe* **12**, 509-520,  
731 doi:10.1016/j.chom.2012.08.004 (2012).
- 732 11 Neff, C. P. *et al.* Diverse Intestinal Bacteria Contain Putative Zwitterionic Capsular  
733 Polysaccharides with Anti-inflammatory Properties. *Cell host & microbe* **20**, 535-547,  
734 doi:10.1016/j.chom.2016.09.002 (2016).
- 735 12 Patrick, S. *et al.* Twenty-eight divergent polysaccharide loci specifying within- and  
736 amongst-strain capsule diversity in three strains of *Bacteroides fragilis*. *Microbiology*  
737 (*Reading, England*) **156**, 3255-3269, doi:10.1099/mic.0.042978-0 (2010).
- 738 13 Porter, N. T. & Martens, E. C. The Critical Roles of Polysaccharides in Gut Microbial  
739 Ecology and Physiology. *Annual review of microbiology* **71**, 349-369,  
740 doi:10.1146/annurev-micro-102215-095316 (2017).
- 741 14 Reyes, A. *et al.* Viruses in the faecal microbiota of monozygotic twins and their mothers.  
742 *Nature* **466**, 334-338, doi:10.1038/nature09199 (2010).
- 743 15 Minot, S. *et al.* The human gut virome: inter-individual variation and dynamic response  
744 to diet. *Genome research* **21**, 1616-1625, doi:10.1101/gr.122705.111 (2011).
- 745 16 Duerkop, B. A. *et al.* Murine colitis reveals a disease-associated bacteriophage  
746 community. *Nature microbiology*, doi:10.1038/s41564-018-0210-y (2018).
- 747 17 Manrique, P. *et al.* Healthy human gut phageome. *Proceedings of the National Academy*  
748 *of Sciences of the United States of America* **113**, 10400-10405,  
749 doi:10.1073/pnas.1601060113 (2016).
- 750 18 Booth, S. J., Van Tassell, R. L., Johnson, J. L. & Wilkins, T. D. Bacteriophages of  
751 *Bacteroides*. *Reviews of infectious diseases* **1**, 325-336 (1979).
- 752 19 Cooper, S. W., Szymczak, E. G., Jacobus, N. V. & Tally, F. P. Differentiation of  
753 *Bacteroides ovatus* and *Bacteroides thetaiotaomicron* by means of bacteriophage. *Journal*  
754 *of clinical microbiology* **20**, 1122-1125 (1984).
- 755 20 Keller, R. & Traub, N. The characterization of *Bacteroides fragilis* bacteriophage  
756 recovered from animal sera: observations on the nature of bacteroides phage carrier  
757 cultures. *The Journal of general virology* **24**, 179-189, doi:10.1099/0022-1317-24-1-179  
758 (1974).
- 759 21 Shkoporov, A. N. *et al.* PhiCrAss001 represents the most abundant bacteriophage family  
760 in the human gut and infects *Bacteroides intestinalis*. *Nature communications* **9**, 4781,  
761 doi:10.1038/s41467-018-07225-7 (2018).
- 762 22 Puig, A., Araujo, R., Jofre, J. & Frias-Lopez, J. Identification of cell wall proteins of  
763 *Bacteroides fragilis* to which bacteriophage B40-8 binds specifically. *Microbiology*  
764 (*Reading, England*) **147**, 281-288, doi:10.1099/00221287-147-2-281 (2001).
- 765 23 Chatzidaki-Livanis, M., Weinacht, K. G. & Comstock, L. E. Trans locus inhibitors limit  
766 concomitant polysaccharide synthesis in the human gut symbiont *Bacteroides fragilis*.  
767 *Proceedings of the National Academy of Sciences of the United States of America* **107**,  
768 11976-11980, doi:10.1073/pnas.1005039107 (2010).



- 769 24 Rogers, T. E. *et al.* Dynamic responses of *Bacteroides thetaiotaomicron* during growth on  
770 glycan mixtures. *Molecular microbiology* **88**, 876-890, doi:10.1111/mmi.12228 (2013).
- 771 25 Hickey, C. A. *et al.* Colitogenic *Bacteroides thetaiotaomicron* Antigens Access Host  
772 Immune Cells in a Sulfatase-Dependent Manner via Outer Membrane Vesicles. *Cell host*  
773 *& microbe* **17**, 672-680, doi:10.1016/j.chom.2015.04.002 (2015).
- 774 26 Chatzidaki-Livanis, M., Coyne, M. J. & Comstock, L. E. A family of transcriptional  
775 antitermination factors necessary for synthesis of the capsular polysaccharides of  
776 *Bacteroides fragilis*. *Journal of bacteriology* **191**, 7288-7295, doi:10.1128/jb.00500-09  
777 (2009).
- 778 27 Pelkonen, S., Aalto, J. & Finne, J. Differential activities of bacteriophage depolymerase  
779 on bacterial polysaccharide: binding is essential but degradation is inhibitory in phage  
780 infection of K1-defective *Escherichia coli*. *Journal of bacteriology* **174**, 7757-7761  
781 (1992).
- 782 28 Krinos, C. M. *et al.* Extensive surface diversity of a commensal microorganism by  
783 multiple DNA inversions. *Nature* **414**, 555-558, doi:10.1038/35107092 (2001).
- 784 29 Martens, E. C., Koropatkin, N. M., Smith, T. J. & Gordon, J. I. Complex glycan  
785 catabolism by the human gut microbiota: the Bacteroidetes Sus-like paradigm. *The*  
786 *Journal of biological chemistry* **284**, 24673-24677, doi:10.1074/jbc.R109.022848 (2009).
- 787 30 Braun, V. FhuA (TonA), the career of a protein. *Journal of bacteriology* **191**, 3431-3436,  
788 doi:10.1128/jb.00106-09 (2009).
- 789 31 Taketani, M., Donia, M. S., Jacobson, A. N., Lambris, J. D. & Fischbach, M. A. A Phase-  
790 Variable Surface Layer from the Gut Symbiont *Bacteroides thetaiotaomicron*. *mBio* **6**,  
791 e01339-01315, doi:10.1128/mBio.01339-15 (2015).
- 792 32 Martens, E. C., Chiang, H. C. & Gordon, J. I. Mucosal glycan foraging enhances fitness  
793 and transmission of a saccharolytic human gut bacterial symbiont. *Cell host & microbe* **4**,  
794 447-457, doi:10.1016/j.chom.2008.09.007 (2008).
- 795 33 Martens, E. C., Roth, R., Heuser, J. E. & Gordon, J. I. Coordinate regulation of glycan  
796 degradation and polysaccharide capsule biosynthesis by a prominent human gut  
797 symbiont. *The Journal of biological chemistry* **284**, 18445-18457,  
798 doi:10.1074/jbc.M109.008094 (2009).
- 799 34 Xu, J. *et al.* A genomic view of the human-*Bacteroides thetaiotaomicron* symbiosis.  
800 *Science (New York, N.Y.)* **299**, 2074-2076, doi:10.1126/science.1080029 (2003).
- 801 35 Nakayama-Imahiji, H. *et al.* Identification of the site-specific DNA invertase responsible  
802 for the phase variation of SusC/SusD family outer membrane proteins in *Bacteroides*  
803 *fragilis*. *Journal of bacteriology* **191**, 6003-6011, doi:10.1128/jb.00687-09 (2009).
- 804 36 Kuwahara, T. *et al.* Genomic analysis of *Bacteroides fragilis* reveals extensive DNA  
805 inversions regulating cell surface adaptation. *Proceedings of the National Academy of*  
806 *Sciences of the United States of America* **101**, 14919-14924,  
807 doi:10.1073/pnas.0404172101 (2004).
- 808 37 Mazmanian, S. K., Liu, C. H., Tzianabos, A. O. & Kasper, D. L. An immunomodulatory  
809 molecule of symbiotic bacteria directs maturation of the host immune system. *Cell* **122**,  
810 107-118, doi:10.1016/j.cell.2005.05.007 (2005).
- 811 38 Donaldson, G. P. *et al.* Gut microbiota utilize immunoglobulin A for mucosal  
812 colonization. *Science (New York, N.Y.)* **360**, 795-800, doi:10.1126/science.aq0926  
813 (2018).

- 814 39 Tomlinson, S. & Taylor, P. W. Neuraminidase associated with coliphage E that  
815 specifically depolymerizes the Escherichia coli K1 capsular polysaccharide. *Journal of*  
816 *virology* **55**, 374-378 (1985).
- 817 40 Gupta, D. S. *et al.*
- 818 41 Barr, J. J. *et al.* Bacteriophage adhering to mucus provide a non-host-derived immunity.  
819 *Proceedings of the National Academy of Sciences of the United States of America* **110**,  
820 10771-10776, doi:10.1073/pnas.1305923110 (2013).
- 821 42 Norman, J. M. *et al.* Disease-specific alterations in the enteric virome in inflammatory  
822 bowel disease. *Cell* **160**, 447-460, doi:10.1016/j.cell.2015.01.002 (2015).
- 823 43 Tartera, C., Araujo, R., Michel, T. & Jofre, J. Culture and decontamination methods  
824 affecting enumeration of phages infecting *Bacteroides fragilis* in sewage. *Applied and*  
825 *environmental microbiology* **58**, 2670-2673 (1992).
- 826 44 Araujo, R. *et al.* Optimisation and standardisation of a method for detecting and  
827 enumerating bacteriophages infecting *Bacteroides fragilis*. *Journal of virological methods*  
828 **93**, 127-136 (2001).
- 829 45 Koropatkin, N., Martens, E. C., Gordon, J. I. & Smith, T. J. Structure of a SusD  
830 homologue, BT1043, involved in mucin O-glycan utilization in a prominent human gut  
831 symbiont. *Biochemistry* **48**, 1532-1542, doi:10.1021/bi801942a (2009).
- 832 46 MJ, M. DirichletReg: Dirichlet Regression in R. (2015).
- 833

## 834 **Figure Legends**

835 **Figure 1.** Host range of *B. thetaiotaomicron* phages on strains expressing different CPS.

836 Seventy-one bacteriophages were isolated and purified on the wild-type,  $\Delta cps$  (acapsular), or the  
837 8 single CPS-expressing *B. thetaiotaomicron* strains. High titer phage stocks were prepared on  
838 their “preferred host strain,” which was the strain that yielded the highest titer of phages in a pre-  
839 screen of phage host range; phages were then tested in a quantitative host range assay. Tenfold  
840 serial dilutions of each lysate ranging from approximately  $10^6$  to  $10^3$  plaque-forming units (PFU)  
841 / ml were spotted onto top agar plates containing each of the 10 bacterial strains. Plates were then  
842 incubated overnight, and plaques on each host were counted. Titers were calculated for each host  
843 and normalized to the titer on the “preferred host strain” for each replicate and replicates ( $n = 3$ )  
844 were averaged. The phages were then clustered based on their plaquing efficiencies on the  
845 different strains (see *Methods*). Each row in the heatmap corresponds to an individual phage,  
846 whereas each column corresponds to one of the 10 host strains. Images at the far right of the

847 figure illustrate the range of plaque morphologies of select phages from the collection (see  
848 **Figure S1** for images of plaques for all phages). ARB25, a phage that is the focus of deeper  
849 investigation is highlighted in red text. Scale bar = 2mm.

850

851 **Figure 2.** Infection by the Branch 3 phages ARB72 (A), ARB78 (B), ARB82 (C), ARB101 (D)  
852 and ARB105 (E) is inhibited by eliminating most or all of the permissive CPS from wild-type *B.*  
853 *thetaitotaomicron*. Each phage was titered on the wild-type strain, the acapsular strain, their  
854 respective preferred host strain (blue bars), and a set of bacterial strains harboring limited CPS  
855 locus deletions that correspond to their predetermined host range (n = 6 replicates/phage). (F)  
856 Elimination of permissive CPS from Branch 2 phage ARB25 reduces infection, but complete  
857 reduction of infection only occurs in the context of deleting more than one permissive CPS. The  
858 number of replicates conducted on each strain is annotated in parentheses next to the strain name.  
859 (G) Relative *cps* locus expression of the 8 *cps* loci in the indicated strains. (H) Representative  
860 pictures of phage plaques on the indicated host strains. The top row of images for each phage is  
861 unaltered; background and unnaturally saturated pixels were removed from images in in the  
862 bottom row to facilitate plaque visualization. Scale bar = 2mm. For panels A-F, significant  
863 differences in phage titers on the preferred host strain were calculated via Kruskal Wallis test  
864 followed by Dunn's multiple comparisons test. \* p < 0.05; \*\* p < 0.01; \*\*\* p < 0.001, \*\*\*\* p <  
865 0.0001. For panel G, deletion of *cps* loci resulted in significant changes in *cps* gene expression  
866 for the missing loci; additionally, significant changes in *cps2* expression were observed in  $\Delta 4$   
867 and  $\Delta 1,4$  strains (p < 0.05 for each change, determined by Dirichlet regression).

868

869 **Figure 3.** Effect of CPS and phage infection on bacterial growth. Ten strains: the wild-type  
870 (WT), the acapsular strain ( $\Delta$ cps), or the eight single CPS-expressing strains were infected with  
871 either live or heat-killed ARB25. Growth was monitored via optical density at 600 nm ( $OD_{600}$ )  
872 on an automated plate reading instrument as described in *Methods*.

873

874 **Figure 4.** ARB25 infection of wild-type *B. thetaiotaomicron* causes altered *cps* gene expression.  
875 Wild-type *B. thetaiotaomicron* was infected with live or heat-killed ARB25 at an MOI of  $\sim 1$ . (A)  
876 Growth was monitored by measuring  $OD_{600}$  every 15-30 minutes. (B) *cps* gene transcript  
877 analysis was carried out by qPCR. The end of the growth curve in panel A represents the point at  
878 which cultures were harvested for qPCR analysis (e.g. the first observed time point where culture  
879 surpassed  $OD_{600}$  of 0.6). Significant changes in *cps1*, *cps3*, and *cps4* expression were observed  
880 between groups treated with live or heat-killed ARB25 ( $p < 0.01$  for each, determined by  
881 Dirichlet regression).

882

883 **Figure 5.** Infection of acapsular *B. thetaiotaomicron* selects for the expression of multiple phase-  
884 variable loci. (A) Wild-type *B. thetaiotaomicron* was infected with ARB25 or was alternatively  
885 exposed to heat-killed ARB25 and cultures were grown to  $OD_{600}=0.6-0.7$ . Cells were harvested  
886 and RNA-seq analysis was carried out as described in *Methods* ( $n=3$  independent experiments  
887 for each treatment group). Transcript abundance was compared between treatment groups and  
888 fold change between ARB25-treated cells versus cells treated with heat killed ARB25 was  
889 calculated and is plotted against the P value (T test with Benjamini-Hochberg correction) for  
890 each fold change calculation. (B) Acapsular *B. thetaiotaomicron* was treated with ARB25 or  
891 heat-killed ARB25 and fold change in transcript abundance was calculated, as described in panel

892 A. (C) Among the genes with increased expression in post-infected acapsular *B.*  
893 *thetaitotaomicron*, 24 genes were part of 8 different gene clusters predicted to encode tyrosine  
894 recombinases along with outer membrane lipoproteins and OmpA-like proteins. These gene  
895 clusters are shown. The numbers inside the gene schematics represent the fold change in  
896 expression in ARB25-treated cells relative to those treated with heat-killed ARB25. Flanking the  
897 promoters of each of these loci are pairs of imperfect, 17 nucleotide palindromic repeats. qPCR  
898 analysis and amplicon sequencing of each orientation of these 8 promoters revealed expected  
899 increases in orientation to the “ON” position in ARB25-exposed acapsular *B. thetaitotaomicron*.  
900 (D) Another chromosomal locus with signatures of phage-selected recombination was identified  
901 by RNA-seq. Specifically, 3 of 4 genes in an operon (BT1042-BT1045) were significantly down-  
902 regulated after exposure to phage and 5 genes in an adjacent operon (BT1046-BT1051) were up-  
903 regulated an average of 8.3-fold. (E) PCR using oligonucleotides flanking direct repeats within  
904 the BT1032-BT1053 locus (green dumbbells, panel D) were used to demonstrate locus  
905 architecture in wild type *B. thetaitotaomicron* and in a mutant lacking the tyrosine recombinase  
906 within this locus (*B. thetaitotaomicron*  $\Delta$ BT1041).

907

908 **Figure 6.** S-layer differentially affects *B. thetaitotaomicron* susceptibility to ARB25 and the  
909 related phage SJC01. Acapsular *B. thetaitotaomicron* S-layer ‘ON’ and ‘OFF’ mutants ( $\Delta$ *cps*  
910 BT1927-ON and  $\Delta$ *cps* BT1927-OFF, respectively) were infected with (A) ARB25 or (B) SJC01  
911 in liquid culture. Growth was monitored via optical density at 600 nm (OD<sub>600</sub>) on an automated  
912 plate reading instrument as described in *Methods*.

913

914 **Table 1.** Susceptibility of strains to infection by ARB25 after infection and passaging.

915

916 **Figure S1.** Representative pictures of phage plaques for all phages from this study: A) phages  
917 from Ann Arbor (ARB); B) phages from San Jose (SJC). The top row of images for each phage  
918 are unaltered; background and saturated pixels were removed from images in the bottom row to  
919 facilitate viewing of the plaques. Scale bar = 2 mm

920

921 **Figure S2.** Replication of subset of host range assays of *B. thetaiotaomicron*-targeting phages on  
922 strains expressing different CPS types. Ten bacteriophages isolated and purified on the wild-  
923 type, acapsular, or the 8 single CPS-expressing strains were re-tested in a spot titer assay to  
924 determine phage host range. 10-fold serial dilutions of each phage ranging from approximately  
925  $10^6$  to  $10^3$  plaque-forming units (PFU) / ml were spotted onto top agar plates containing the 10  
926 bacterial strains. Plates were then grown overnight, and phage titers were calculated. Titers are  
927 normalized to the titer on the preferred host strain for each replicate. Each row in the heatmap  
928 corresponds to a replicate for an individual phage, whereas each column corresponds to one of  
929 the 10 host strains. One to three replicates of the assay were conducted for each phage by the two  
930 lead authors (AJH and NTP). Assays were carried out at the same time, and each author used the  
931 same set of cultures and phage stocks. For comparison, individual replicates from **Figure 1** are  
932 included (marked with \*)

933

934 **Figure S3.** A) Phage titers in infected cultures incubated with purified capsules. ARB25 was  
935 incubated with purified CPS1 or CPS2 (1 mg/ml) before plating on the acapsular strain, and  
936 plaques were counted after overnight incubation. Titers are normalized to mock (H<sub>2</sub>O) treatment.

937 No significant differences in titers were found compared to mock treatment, as determined by  
938 Welch's t test. B) Wild-type *B. thetaiotaomicron* was infected with live or heat-killed ARB25,  
939 and bacterial growth was monitored via optical density at 600 nm (OD<sub>600</sub>) on an automated  
940 plate reader for 12 hours. At 0, 6.02, 8.36, and 11.7 hours post inoculation, replicate cultures  
941 were removed and phage levels were titered. No phage were detected in heat-killed controls.

942

943 **Figure S4.** Infection of wild-type *B. thetaiotaomicron* at a low multiplicity of infection and  
944 subsequent effects on *cps* ene expression. (A) The wild-type (WT) strain was infected at a low  
945 multiplicity of infection (MOI =  $1 \times 10^{-4}$ ) of live or heat-killed ARB25, and bacterial growth was  
946 monitored via OD<sub>600</sub>. (B) RNA was harvested from cultures after reaching an OD of 0.6-0.7,  
947 cDNA was generated, and relative expression of the 8 *cps* loci was determined by qPCR.

948

949 **Figure S5.** Single replicates of *cps* expression in heat-killed versus live phage-treated *B.*  
950 *thetaitaomicron*. Relative *cps* CPS transcript abundance in ARB25 infection experiments at  
951 high MOI (A) and low MOI (B). In the high MOI experiment, replicate 2 showed higher starting  
952 expression of the non-permissive CPS3 compared to others. In the low MOI experiment,  
953 replicate 3 showed higher starting expression of the non-permissive CPS3. In both experiments,  
954 post phage-exposed replicates displayed nearly identical CPS expression profiles characterized  
955 by high expression of CPS3.

956

957 **Figure S6.** Determination of phase-variable promoter switching for six loc encoding putative S-  
958 layer proteins. The hypothesis that the promoters associated with seven newly identified *B.*

959 *thetaitotaomicron* S-layer like lipoproteins was validated using a PCR amplicon sequencing  
960 strategy. Because of high nucleotide identity in both the regions flanking the 7 new loci, a nested  
961 PCR approach was required to specifically amplify and sequence each site. In the first step, a  
962 primer lying in each S-layer gene (**Table S3** “S-layer gene” primers) was oriented towards the  
963 promoter and used in a PCR extension to a primer in the upstream recombinase gene (**Table S3**  
964 “recombinase gene 3” primer). The products of this PCR were purified without gel extraction  
965 and used in a second reaction with a nested primer that lies internal to the previous recombinase  
966 gene primer (**Table S3** “recombinase 2” primer). The expected PCR products from this reaction,  
967 which are ~1 kb and span promoter sequences in both the ON and OFF orientations, were  
968 excised and used for an orientation-specific PCR using the original S-layer gene primer for each  
969 site and a universal primer (green schematic) that was designed for each promoter and is oriented  
970 to extend upstream of the S-layer gene (e.g., OFF orientation). Resulting products from this third  
971 reaction, which should correspond to the ON orientation if a promoter inversion has occurred in  
972 some cells, were obtained for 5/7 of the newly identified loci and the BT1927 S-layer locus as a  
973 control. In all cases in which an amplicon and sequence were obtained, the expected  
974 recombination occurred between the inverted repeat site proximal to the S-layer gene start (new  
975 DNA junction), which would orient the promoter to enable expression of the downstream S-layer  
976 gene. The sequences shown are the consensus between forward and reverse reads for each  
977 amplicon. The putative core promoter -7 sequence is shown in bold/red text, the coding region of  
978 each S-layer gene is shown in bold/blue text and the S-layer gene proximal recombination site is  
979 noted and highlighted in bold/gold text. Note that the 5’-end of the sequenced amplicon was not  
980 resolved for the BT2486 locus.

981



982 **Figure S7.** Recombination between the genes BT1040, BT1042, and BT1046. (A) Pfam domain  
983 schematics of the amino acid sequences of these three genes highlighting that BT1040 and  
984 BT1046, as originally assembled in the *B. thetaiotaomicron* genome sequence, lack additional N-  
985 terminal sequences that are present on BT1042. (B) Sequencing of the 8 PCR amplicons  
986 schematized in **Figure 5C**. Amplicons 1, 5 and 8 represent the original genome architecture,  
987 while the others represent inferred recombination events that are validated here by sequencing.  
988 The 5' and 3' ends of the BT1042, BT1040 and BT1046 genes are color-coded to assist in  
989 following their connectivity changes after recombination. A series of single-nucleotide  
990 polymorphisms (SNPs) present in BT1042, downstream of the proposed recombination site, are  
991 highlighted in yellow. The transfer of these SNPs to a fragment containing the 5' end of BT1040  
992 (Amplicon 4) was used to narrow the recombination region to the 7 nucleotide sequence  
993 highlighted in red. Additional SNPs that are specific to the regions upstream of this  
994 recombination site are shown in white text for each sequence.

995

996 **Figure S8.** The BT1033-52 locus does not affect susceptibility of acapsular *B. thetaiotaomicron*  
997 to ARB25. Ten-fold serial dilutions of ARB25 were spotted onto lawns of *B. thetaiotaomicron*  
998  $\Delta cps$  (n=5) and *B. thetaiotaomicron*  $\Delta cps \Delta BT1033-52$  (n=5, n=3 independent clones each).  
999 Plaquing efficiency was determined by normalizing plaque counts on *B. thetaiotaomicron*  $\Delta cps$   
1000  $\Delta BT1033-52$  relative to plaque counts on *B. thetaiotaomicron*  $\Delta cps$  for each replicate. Statistical  
1001 significance was determined using the Mann-Whitney test.

1002

1003 **Table S1.** Phages used in this study and details on their isolation.

1004

1005 **Table S2.** Genes that are differentially regulated in post ARB25-infected wild-type and

1006 acapsular *B. thetaiotaomicron*.

1007

1008 **Table S3.** Bacterial strains and plasmids used in this study.

1009

1010 **Table S4.** Primers used in this study.

1011

Figure 1

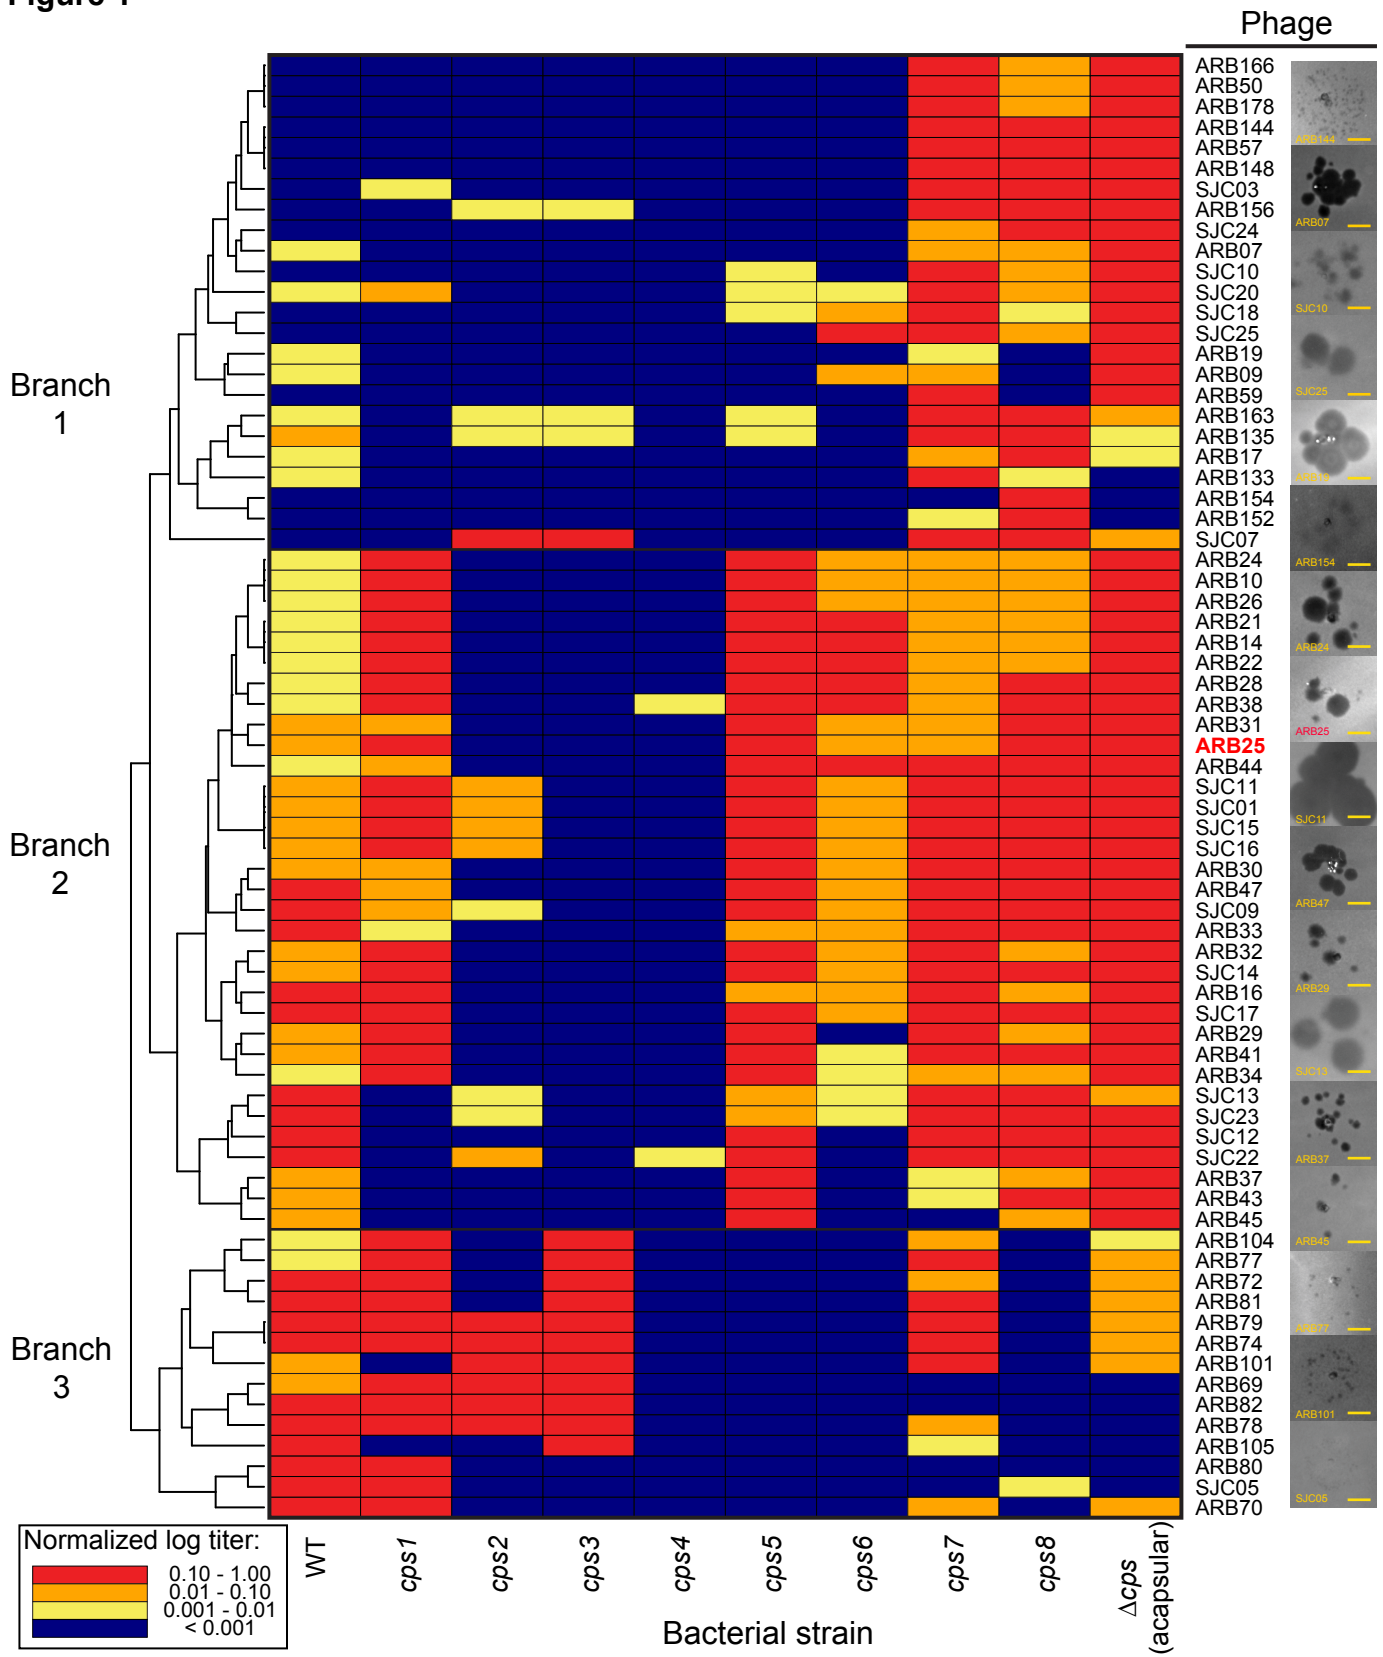

## Figure 2

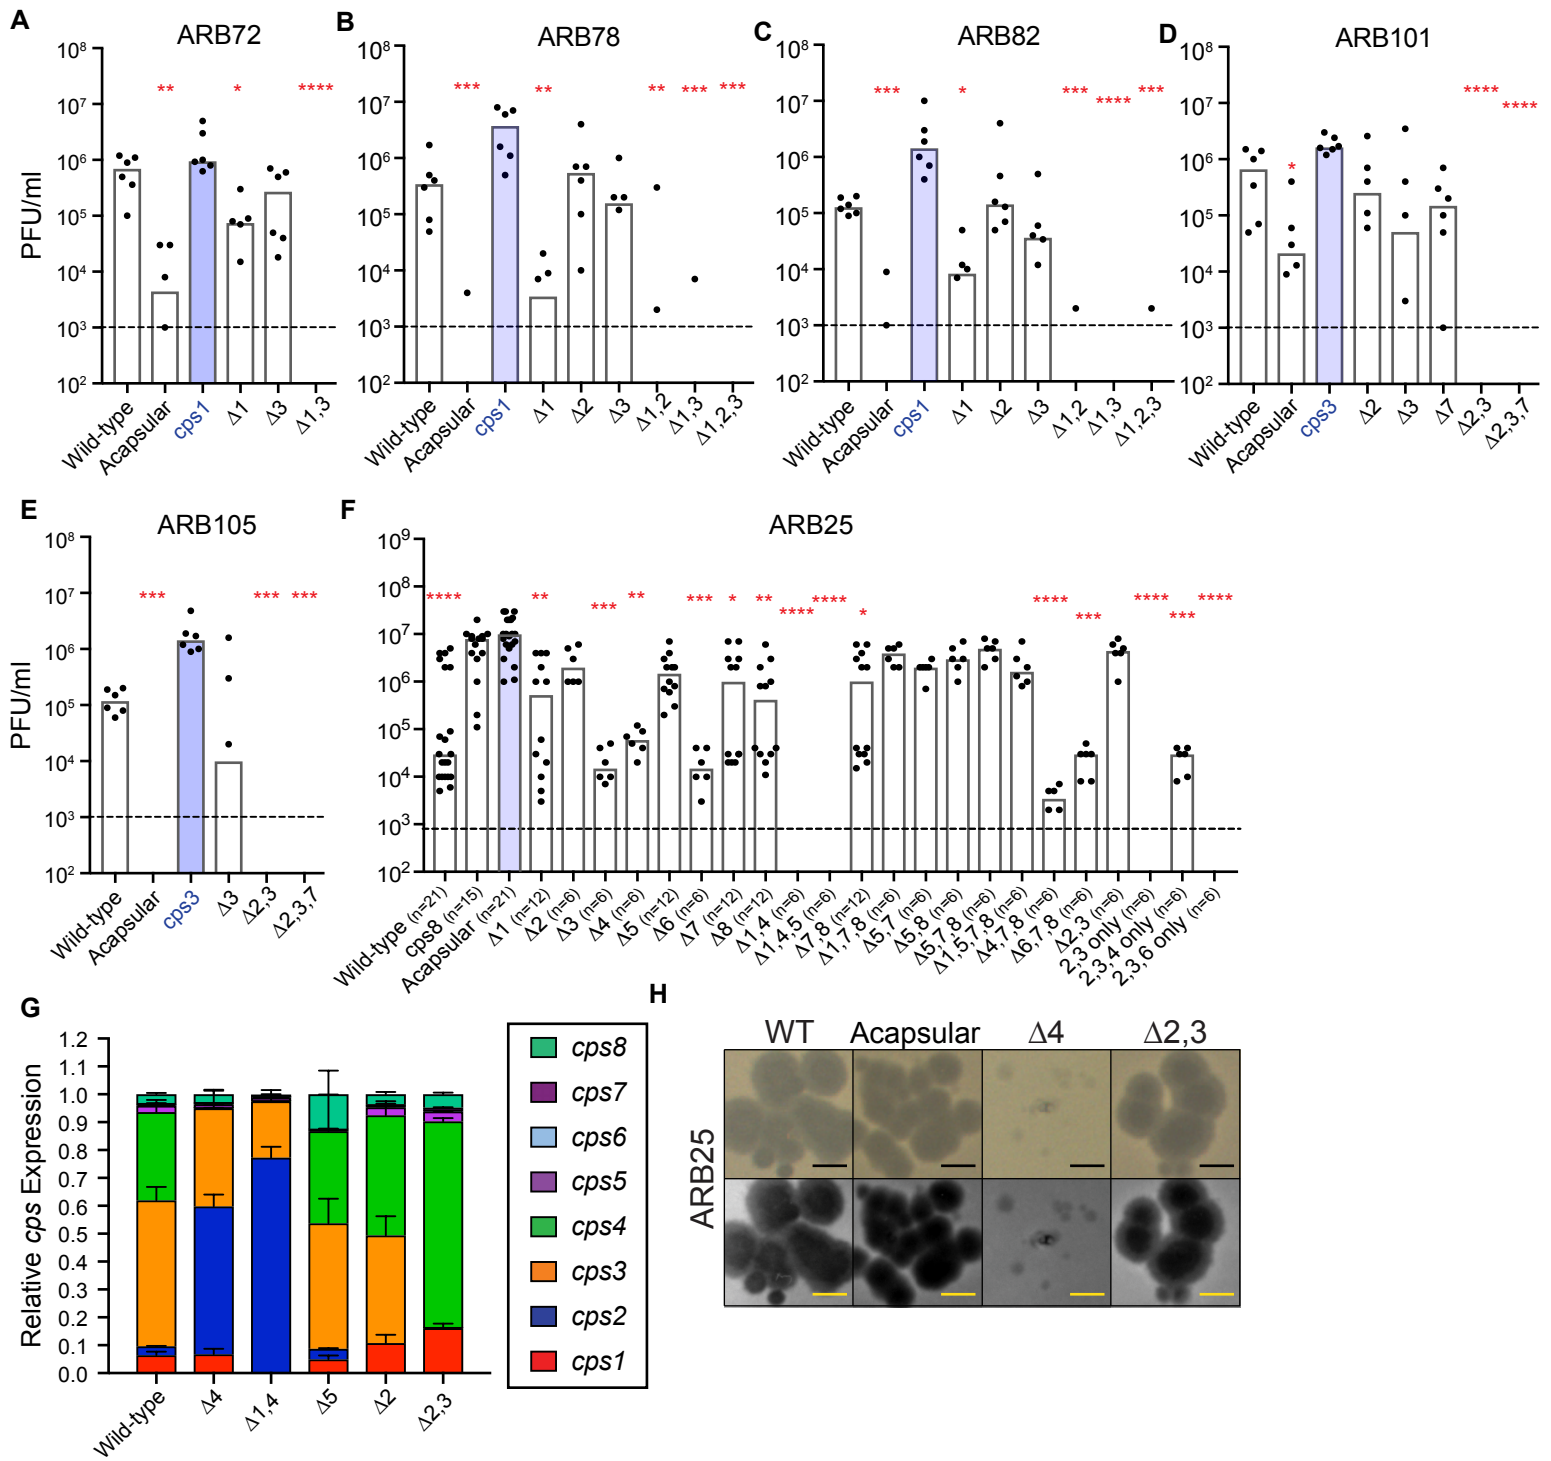

**Figure 3**

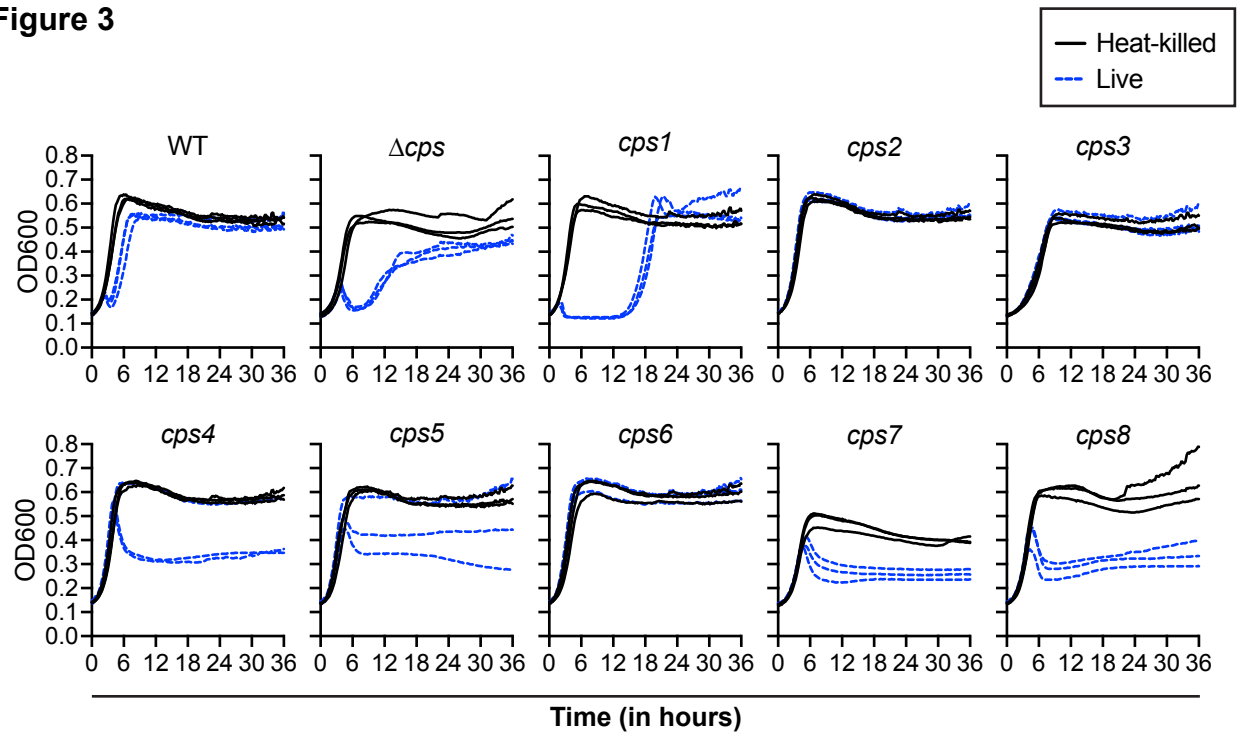

**Figure 4**

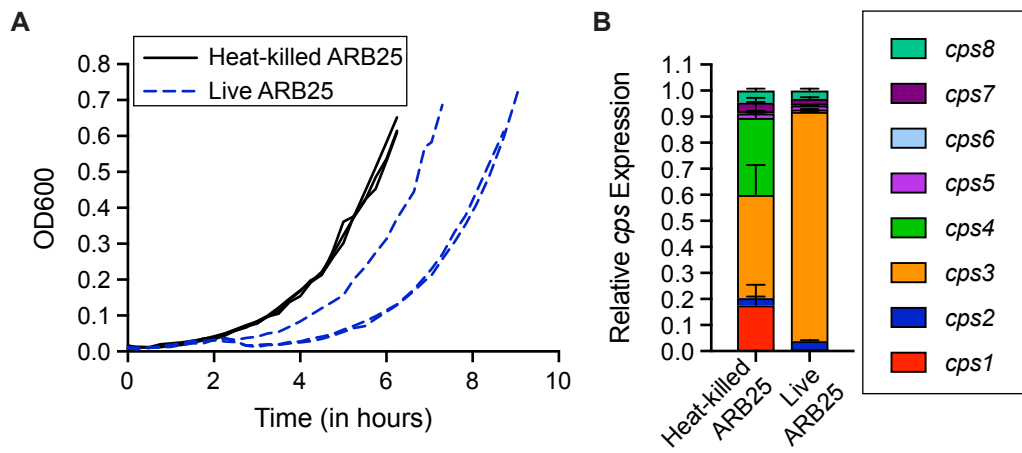

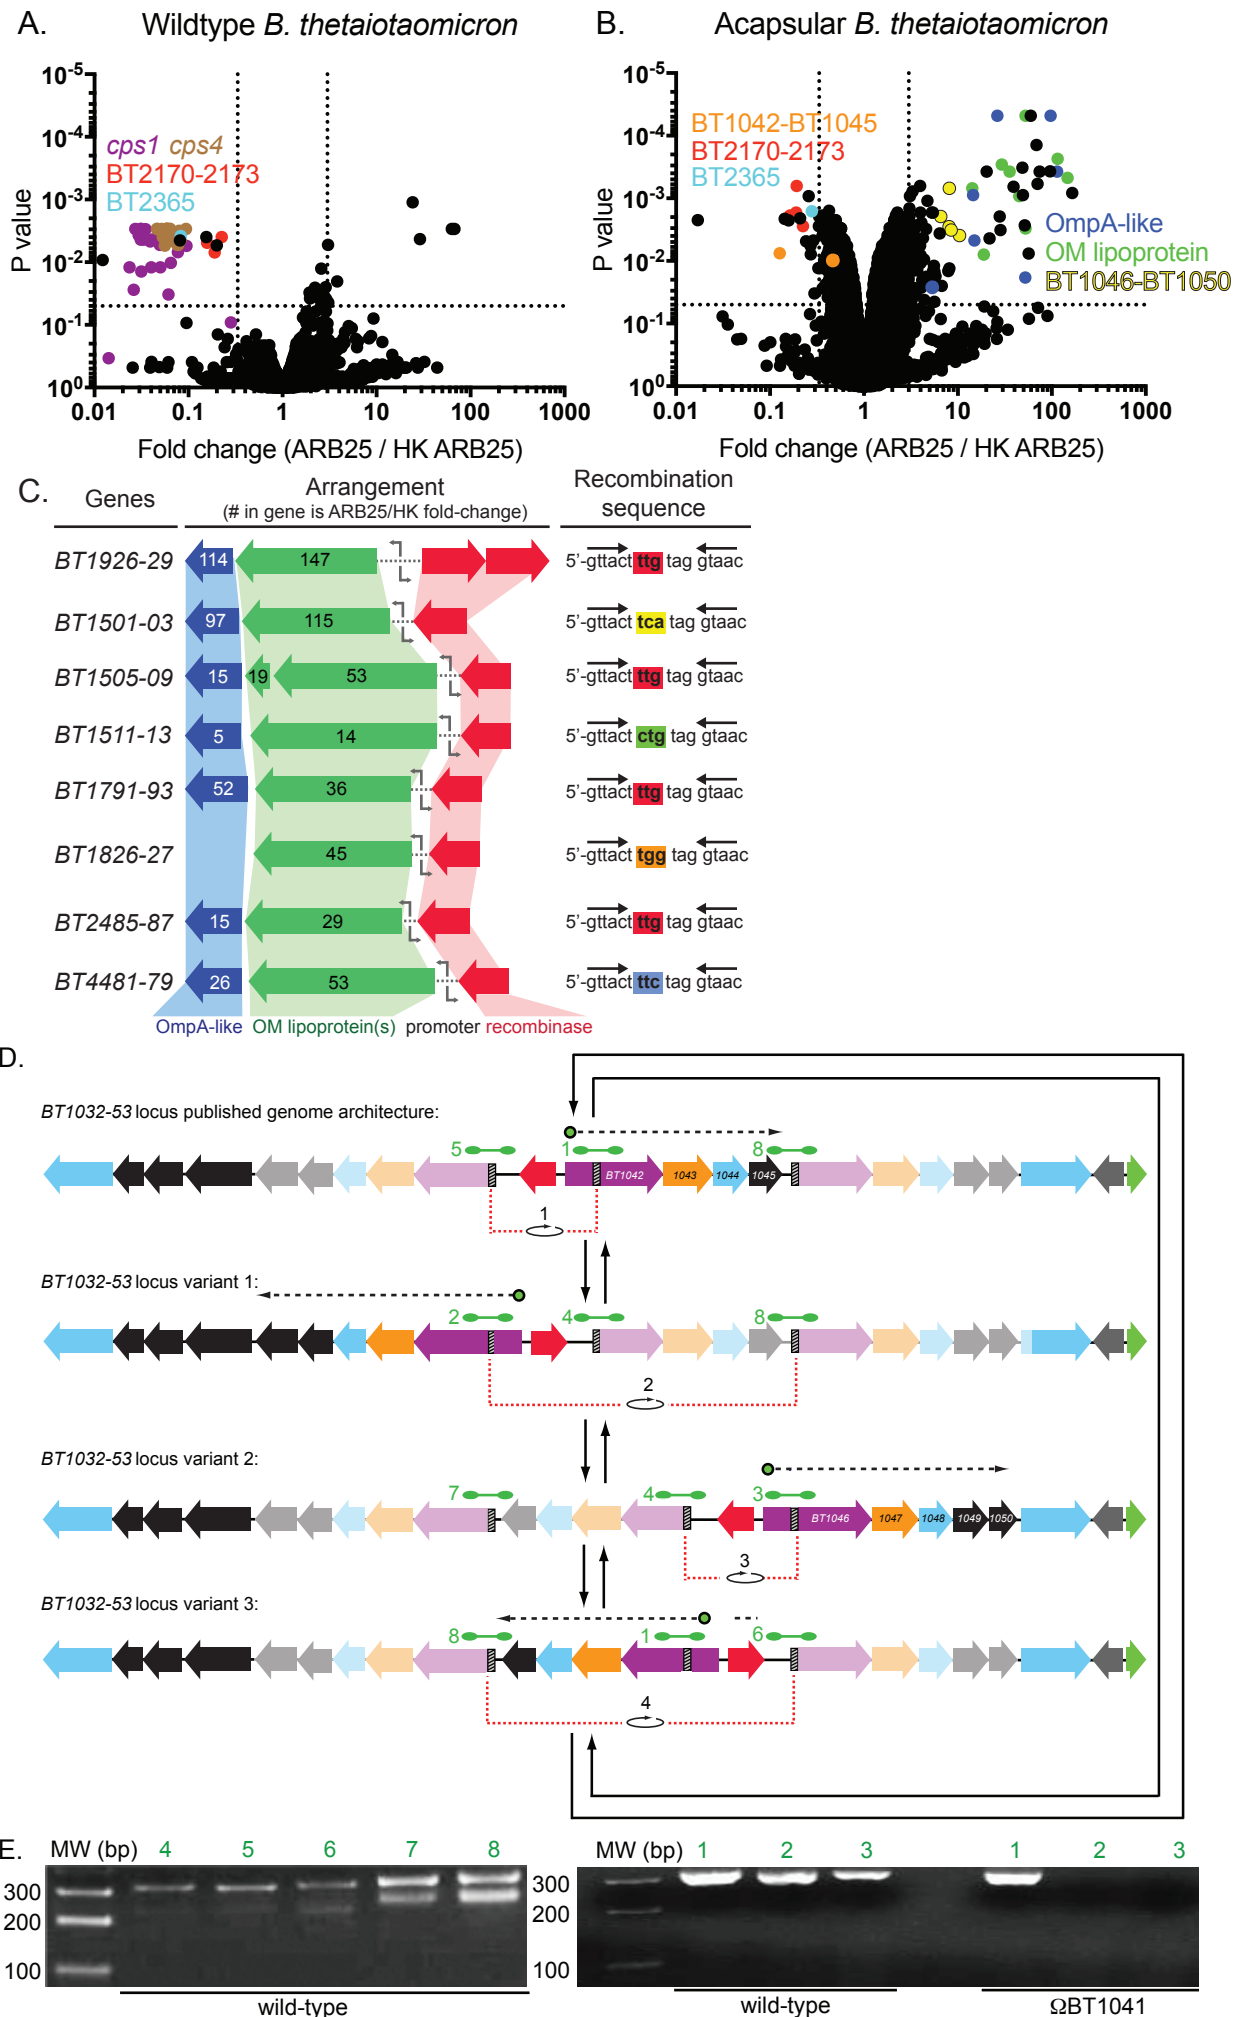

Figure 6

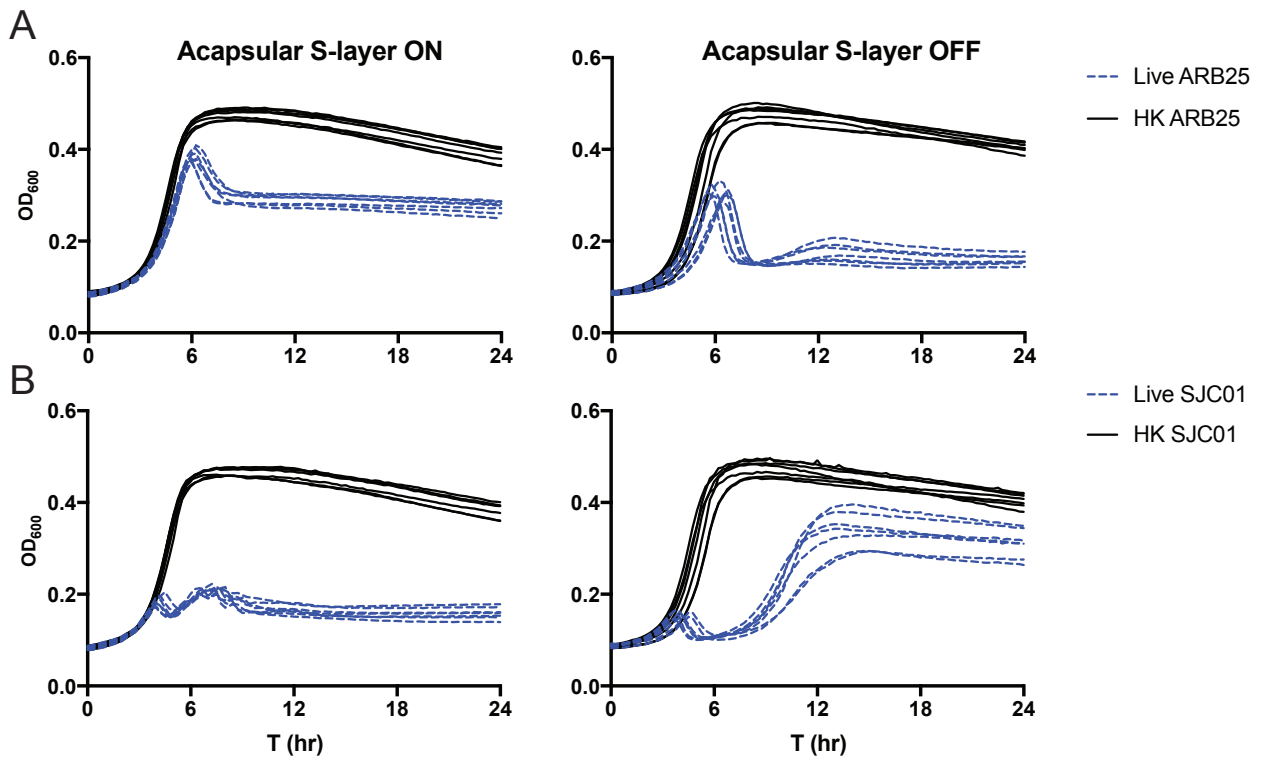



**Table 1. Bacterial susceptibility to secondary ARB25 infection**

| <b>Strain</b>                                         | <b># susceptible isolates after first infection</b> | <b># susceptible isolates after second infection</b> |
|-------------------------------------------------------|-----------------------------------------------------|------------------------------------------------------|
| Wild-type                                             | 9/9 (100%)                                          | 9/17 (53%)                                           |
| cps1                                                  | 9/9 (100%)                                          | 15/17 (88%)                                          |
| cps2                                                  | 0/9 (0%)                                            | 0/18 (0%)                                            |
| cps4                                                  | 2/9 (22%)                                           | 8/11 (73%)                                           |
| Acapsular                                             | 9/9 (100%)                                          | 10/16 (63%)                                          |
| <b>Total of phage-susceptible strains<sup>a</sup></b> | <b>29/36 (81%)</b>                                  | <b>42/61 (69%)</b>                                   |

<sup>a</sup>Wild-type, cps1, cps4, and acapsular
